# Supplementary material for: Systematic review and meta-analysis of the association between peripheral inflammatory cytokines and generalised anxiety disorder
Source: PubMed Central journal article supplement (PMC6661660; doi:10.1136/bmjopen-2018-027925), 2019-07-19
Supplement: bmjopen-2018-027925.draft_revisions.pdf [file bmjopen-2018-027925.draft_revisions.pdf]

# BMJ Open

BMJ Open is committed to open peer review. As part of this commitment we make the peer review history of every article we publish publicly available.

When an article is published we post the peer reviewers' comments and the authors' responses online. We also post the versions of the paper that were used during peer review. These are the versions that the peer review comments apply to.

The versions of the paper that follow are the versions that were submitted during the peer review process. They are not the versions of record or the final published versions. They should not be cited or distributed as the published version of this manuscript.

BMJ Open is an open access journal and the full, final, typeset and author-corrected version of record of the manuscript is available on our site with no access controls, subscription charges or pay-per-view fees (<http://bmjopen.bmj.com>).

If you have any questions on BMJ Open's open peer review process please email [info.bmjopen@bmj.com](mailto:info.bmjopen@bmj.com)

# BMJ Open

## **A systematic review and meta-analysis of the association between peripheral inflammatory cytokines and generalised anxiety disorder**

|                               |                                                                                                                                                                                                                                                                |
|-------------------------------|----------------------------------------------------------------------------------------------------------------------------------------------------------------------------------------------------------------------------------------------------------------|
| Journal:                      | <i>BMJ Open</i>                                                                                                                                                                                                                                                |
| Manuscript ID                 | bmjopen-2018-027925                                                                                                                                                                                                                                            |
| Article Type:                 | Research                                                                                                                                                                                                                                                       |
| Date Submitted by the Author: | 14-Nov-2018                                                                                                                                                                                                                                                    |
| Complete List of Authors:     | Costello, Harry; University College London Division of Psychiatry, Gould, Rebecca; University College London Division of Psychiatry Abrol, Esha; University College London Division of Psychiatry Howard, R; University College London Division of Psychiatry, |
| Keywords:                     | Anxiety disorders < PSYCHIATRY, Immunology < BASIC SCIENCES, PSYCHIATRY                                                                                                                                                                                        |
|                               |                                                                                                                                                                                                                                                                |

SCHOLARONE™  
Manuscripts

# A systematic review and meta-analysis of the association between peripheral inflammatory cytokines and generalised anxiety disorder

---

**H. Costello<sup>1</sup>, R.L. Gould<sup>1</sup>, E. Abrol, R.J. Howard<sup>1</sup>**

<sup>1</sup> Division of Psychiatry, University College London, London W1T 7NF, United Kingdom

\* Address correspondence to Dr. Harry Costello: [h.costello@ucl.ac.uk](mailto:h.costello@ucl.ac.uk)

4603 words (excluding abstract: 274 words)

## Abstract

**Aim:** To systematically review and meta-analyse studies measuring peripheral cytokine levels in people with generalised anxiety disorder (GAD) compared to controls.

**Methods:** We searched MEDLINE (1950–), EMBASE (1947–), PsycINFO (1872–) and Web of Science (1945–) databases up until January 2018. Studies that met inclusion criteria were assessed for quality and data were extracted. Meta-analysis using a random-effects model was conducted for individual cytokines where sufficient data from three or more studies were available.

**Results:** 14/1718 identified studies met inclusion criteria, comprising 1188 patients with GAD and 10,623 controls. In total 16 different cytokines were evaluated. Significantly raised levels of CRP, IFN- $\gamma$  and TNF- $\alpha$  were reported in GAD patients compared to controls in two or more studies. Ten further pro-inflammatory cytokines were reported to be significantly raised in GAD in at least one study. However, 5/14 studies found no difference in levels of at least one cytokine. Only CRP studies reported sufficient data for meta-analysis. A significantly higher level of CRP was found in people with GAD compared to controls, with a small effect size (Cohen's  $d = 0.38, 0.06-0.69$ ), comparable to that reported in schizophrenia. However, heterogeneity was high ( $I^2 = 75\%$ ), in keeping with meta-analyses of inflammatory markers in other psychiatric conditions and reflecting potential differences in mediators of inflammation including medication use, co-morbid depression and cytokine sampling methodology.

**Conclusion:** There is preliminary evidence to suggest an inflammatory response in GAD, but it remains unclear whether inflammatory cytokines play a role in aetiology. GAD remains a poorly studied area of neuroinflammation compared to other mental disorders and further longitudinal studies confirming and characterising the role and profile of inflammation are required.

## Strengths and limitations of this study

- This is a comprehensive systematic review, and the first meta-analysis, of peripheral cytokine levels in people with generalised anxiety disorder (GAD).
- Our review examined the cross-sectional and longitudinal associations between inflammatory biomarkers and GAD.
- Relatively few studies, of variable quality, were identified and only one study examined the longitudinal association between inflammation and GAD.
- Only studies measuring C-reactive protein reported sufficient data for meta-analysis.
- We were unable to analyse publication bias due to the paucity of studies included in meta-analysis.

## Introduction

There is growing evidence for immune mediated pathogenic mechanisms in several psychiatric disorders with discrete profiles of inflammatory mechanisms<sup>1</sup>. Epidemiological evidence has shown an increased risk of mood disorders and psychosis in people with a history of severe infection or autoimmune conditions<sup>2,3</sup>. This has been supported by genome wide association studies implicating multiple immune signalling pathways<sup>4</sup>, and altered

1  
2  
3 profiles of pro-inflammatory cytokines and acute phase reactants in schizophrenia<sup>5</sup>,  
4 depression<sup>6</sup>, obsessive compulsive disorder (OCD)<sup>7</sup> and bipolar disorder<sup>8</sup>. However, the  
5 relationship between inflammation and mental illness remains poorly understood and  
6 controversial, with a number of proposed potential neuropathological mechanisms<sup>9,10</sup>,  
7 including changes in microglial function<sup>1</sup>, glutamatergic excitotoxicity<sup>11</sup>, synaptic plasticity<sup>12</sup>  
8 and reduced hippocampal neurogenesis<sup>13</sup>.  
9  
10

11  
12 Despite increasing interest in the role of inflammation in mental illness, relatively little  
13 research has focused on potential associations with anxiety disorders<sup>14</sup>. These are common,  
14 with an estimated lifetime prevalence of 7.3% to 28.8%, are associated with substantial  
15 functional impairment and are estimated to cost between 42-47 billion dollars to the U.S  
16 economy each year<sup>15,16</sup>. However, only 60% of patients are thought to respond to  
17 pharmacological and psychological treatments and understanding of the underlying  
18 pathophysiological mechanisms of anxiety disorders remains poor<sup>17</sup>.  
19  
20  
21  
22

23 Generalised anxiety disorder (GAD) is the most common anxiety disorder, with a degree of  
24 associated disability equivalent to that of major depressive disorder (MDD)<sup>18</sup>. Despite  
25 psychopharmacological<sup>19</sup> and psychological<sup>20</sup> treatments showing effectiveness in GAD,  
26 42% of people living with GAD experience ongoing symptoms after 12 years and half of  
27 remitted patients experience recurrence<sup>18</sup>. GAD is more prevalent in those with inflammatory  
28 conditions such as rheumatoid arthritis (RA)<sup>21,22</sup>, with case series studies suggesting  
29 symptoms are less common with immune modulating treatment targeting specific  
30 inflammatory cytokines<sup>23</sup>. The chronic clinical course and relatively high probability of  
31 recurrence in GAD, in addition to preliminary evidence of an inflammatory component in  
32 other anxiety disorders<sup>7,24</sup>, suggest that inflammation could be an important neurobiological  
33 mechanism in the aetiology of this disorder.  
34  
35  
36  
37  
38

39 To date, two previous reviews of inflammatory biomarkers in GAD have been conducted. Of  
40 these, however, one was a narrative review<sup>25</sup> and the other was restricted to literature  
41 published within the last decade<sup>14</sup>, and with a focus on all anxiety disorders. Both reviews  
42 reported that there was preliminary evidence for inflammatory changes in GAD. However,  
43 only three studies were identified by the systematic review reporting cytokine changes in  
44 GAD and no meta-analysis was performed. No study to date has conducted a comprehensive  
45 systematic review and meta-analysis of all current literature focusing on GAD or commented  
46 on the longitudinal association between inflammation and GAD.  
47  
48  
49  
50

51 We aimed to systematically review the cross-sectional and longitudinal associations between  
52 inflammatory biomarkers and GAD, and perform the first meta-analysis of inflammatory  
53 biomarkers in GAD.  
54  
55  
56

## 57 Method

58 We conducted a systematic review of studies that had included people with GAD who had  
59 undergone peripheral cytokines measurement and a between group meta-analysis of cytokine  
60

1  
2  
3 levels in people with GAD compared to controls. We conducted the study according to  
4 Preferred Reporting Items for Systematic Reviews and Meta-analyses (PRISMA)  
5 guidelines<sup>26</sup>.  
6  
7

8 We searched MEDLINE (1950–), EMBASE (1947–), PsycINFO (1872–) and Web of Science  
9 (1945–) databases up until January 2018. Reference lists of eligible studies were then  
10 searched for further ones that met eligibility criteria.  
11  
12

13  
14 Our search terms were: (inflammat\* or cytokine or interferon or IFN or interleukin or  
15 “translocator protein” or TSPO or “tumour necrosis factor” or “tumor necrosis factor” or  
16 TNF or IL-1 or IL-2 or IL-4 or IL-7 or IL-6 or IL-8 or IL-10 or microglia or t-cell or  
17 lymphocyte or “C-reactive protein” or “C reactive protein” or CRP or “acute phase protein”  
18 or “fibrinogen”) and (“generalised anxiety disorder” or “generalized anxiety disorder” or  
19 GAD or worry).  
20  
21  
22

23 We included primary, quantitative research studies (including unpublished theses and  
24 dissertations), written in any language, that included people with a diagnosis of GAD  
25 assessed using standardised clinical interview (e.g. Structured Clinical Interview for DSM<sup>27</sup>)  
26 or standardised psychometric instruments. Studies reported cross-sectional or longitudinal  
27 data in clinical or community populations. Cross-sectional studies measured inflammatory  
28 biomarker concentrations in anxious people versus non-anxious healthy controls, while  
29 longitudinal studies measured inflammatory biomarker concentrations at baseline and anxiety  
30 scores at follow-up. Inflammatory markers were measured in the unstimulated state (no  
31 antigen induced stimulation of cytokine production) and sampled from peripheral blood,  
32 CSF, or saliva at any time of day. Exclusion criteria included studies with less than 5  
33 participants, studies in animals and studies where subjects were participants in the treatment  
34 arms of clinical trials.  
35  
36  
37  
38  
39  
40

### 41 **Data extraction and quality assessment**

42 Data were extracted and quality assessed for all studies that met eligibility criteria by two  
43 independent raters (HC, EA) with disagreements settled by consensus and discussion. For  
44 each cytokine, we extracted the means, variance estimates or 95% confidence intervals (CIs)  
45 and sample size for GAD and control groups. We also extracted demographic data (e.g. age,  
46 sex) and clinical data (e.g. medication use, co-morbid depression, severity) where available.  
47 Authors were contacted for further information, where necessary.  
48  
49  
50  
51

52 Risk of bias and study quality were evaluated using the Newcastle–Ottawa Quality  
53 Assessment Scale<sup>28</sup>. Other potential confounding factors (including assay type and  
54 sensitivity, inflammatory marker analysis and recruitment methods) were also examined to  
55 allow more detailed bias and quality analysis of studies.  
56  
57  
58  
59  
60

## Strategy for data synthesis

Separate meta-analyses were performed for individual biomarkers in GAD versus controls if sufficient data were available from a minimum of three studies. Due to different measurement methods and anticipated high heterogeneity, we estimated a standardised mean difference (SMD) for each inflammatory marker, and used a random effects model for meta-analysis, conducted using Revman 5. Heterogeneity across studies was quantified with the  $I^2$  statistic, with a value of 25% typically regarded as low, 50% as medium, and 75% as high<sup>29</sup>. If studies were longitudinal or trials of interventions with multiple data collection points, we examined baseline data only to avoid skewed meta-analysis from inclusion of more than one effect size from the same study.

## Results

### Systematic review

We identified 1718 papers, excluded 1598 of these by titles and abstracts, and retrieved the remaining 120 papers, of which 14 met eligibility criteria and were included in the final systematic review (see Figure 1)<sup>30-43</sup>. The primary reasons for rejection were that no diagnosis of GAD was recorded or no inflammatory marker was measured.

Characteristics of the 14 included studies are shown in Tables 1 and 2. Studies comprised a total of 1188 people with a diagnosis of GAD and 10,623 controls, with a further 116 participants from a study that did not report GAD and control group sizes.

In total, 16 different cytokines were evaluated (see Table 2) C-reactive protein (CRP) (9/14 studies, 64.2%), tumour necrosis factor- $\alpha$  (TNF- $\alpha$ ) (6/14 studies, 42.9%), IL-6 (5/14 studies, 35.7%) and interferon- $\gamma$  (IFN- $\gamma$ ) (3/14 studies, 21.4%) were most commonly studied. All other cytokines were only analysed in two or less studies.

Twelve studies (85.7%) reported the assay method used, all of which were versions of an enzyme-linked immunosorbent assay (ELISA) or enzyme immunoassay (EIA). However, only 7 studies (50%) reported assay sensitivity. All but one study used blood component samples to assess inflammatory marker levels, with the most common sample type being serum (N=6, 42.9%) and plasma (N=4, 28.6%).

### Risk of bias and quality in individual studies

All included studies had adequate case definition, with participants meeting diagnostic criteria for GAD according to DSM or ICD, with 12 studies (85.7%) using a structured clinical interview for assessment (see Table 1).

Most (71.4%) studies included people aged 18-65, but two studies (14.3%) only included participants over the age of 50 and a further two studies (14.3%) used adolescent participant cohorts. The majority (78.6%) of studies accounted for age and sex differences in their analyses. Only 8/14 studies (57.1%) recorded participants' body mass index (BMI) which is

1  
2  
3 known to correlate with inflammation, and only half of these accounted for BMI differences  
4 in analysis of group differences<sup>44</sup> (see Table 2).  
5

6 Use of psychotropic medication and presence of comorbid major depressive disorder are  
7 important moderators of inflammation in other psychiatric disorders<sup>24</sup>. Six studies (42.8%)  
8 excluded patients who used psychiatric or other immune-modulating medication, though only  
9 two studies (4.3%) reported medication use. The majority of studies (64.2%) either excluded  
10 patients with co-morbid MDD or adjusted for this in analyses.  
11  
12  
13

14 Concurrent physical illness is clearly an important determinant of inflammatory cytokine  
15 levels and this was accounted for by the majority of included studies by either excluding  
16 participants with co-morbidities (5 studies, 35.7%) or adjusting for chronic physical illness in  
17 group comparisons (6 studies, 42.8%), though two studies specifically only included  
18 participants with co-morbid cardiovascular disease. Use of a pre-determined cut-off value for  
19 cytokine levels was employed by three studies (21.4%) to ensure that cases with acute  
20 infection were excluded from the sample.  
21  
22  
23  
24

25 Many inflammatory markers exhibit a diurnal pattern of expression and are affected by  
26 consumption of food, thus time of day of sampling and whether the sample was taken in a  
27 fasted state are important factors to consider in analysing relative levels of cytokines<sup>45</sup>.  
28 However, time of day of sampling was only recorded in a minority of studies (6 studies,  
29 42.8%), and the same number of studies recorded whether fasted samples were taken.  
30  
31

32 The overall quality of studies included in the review varied significantly, with Newcastle-  
33 Ottawa scale scores ranging from 2 to 9 (see Table 3). The area in which most studies were  
34 inadequate was in reporting non-response rate and detailing recruitment methods (see Table  
35 3). Lowest quality studies were abstracts or dissertations, and two studies lacked control  
36 groups as only GAD patients were sampled (see Table4).  
37  
38  
39

### 40 **C-reactive protein**

41 CRP is a critical early pro-inflammatory surveillance molecule involved in the activation of  
42 the complement system and both innate and adaptive immune systems<sup>46</sup>. We identified nine  
43 studies that investigated the association between GAD and CRP, comprising a total of 11,486  
44 participants (see Table 5).  
45  
46  
47

48 Four studies, involving 578 GAD patients and 4046 controls, provided sufficient information  
49 to conduct a meta-analysis of CRP levels in GAD<sup>33,39,41,43</sup> (see Figure 2). This was the only  
50 inflammatory marker for which meta-analysis was possible. Meta-analysis showed  
51 significantly raised CRP in GAD compared to controls (SMD 0.38, 95% CI 0.06-0.69;  
52  $Z=2.36$ ,  $p=0.02$ ) (see Figure 2). However, there was a large and statistically significant  
53 degree of heterogeneity between studies ( $\text{Chi}^2=12.0$ ;  $\text{df}=3$ ;  $p=0.007$ ;  $I^2 = 75\%$ ). Given the  
54 high heterogeneity and inclusion of less than 10 studies in the meta-analysis we did not have  
55 sufficient power to examine publication bias<sup>47</sup>.  
56  
57  
58  
59  
60



1  
2  
3 Five studies<sup>30,33,39,41,43</sup> (n=4669), one of which was conducted in 16 year olds<sup>39</sup> and two in  
4 participants with co-morbid heart disease<sup>30</sup>, reported significantly higher CRP levels in  
5 participants with a diagnosis of GAD. The largest study<sup>31</sup> (n=5810) examining CRP in GAD  
6 examined CRP levels in children from baseline measurement aged 9-16 years to follow up  
7 aged 19-21. This was the only study to examine the longitudinal association between GAD  
8 and CRP, and found a bivariate association both cross-sectionally and over time between  
9 GAD and elevated CRP, however, this was accounted for by potential co-variables including  
10 BMI and medication use. The only study<sup>40</sup> to find an inverse correlation between CRP and  
11 GAD was conducted in non-smoking women from a longitudinal study in Finland and did not  
12 specify the numbers of participants with a diagnosis of GAD or group differences.  
13  
14  
15  
16  
17

18 No difference was found in a cohort study (n=821) that used a combined inflammatory index  
19 consisting of CRP, IL-6 and TNF- $\alpha$  in 93 patients with a diagnosis of GAD and controls with  
20 a history of cardiovascular disease (CVD)<sup>35</sup>. Subgroup analysis examining differences in  
21 individual inflammatory markers was not reported<sup>35</sup>.  
22  
23

24 We found two studies<sup>36,43</sup> (n= 196) that examined the association of severity of GAD  
25 symptoms with CRP level. One found a significant positive correlation between CRP level  
26 and GAD-7 scores<sup>43</sup>, and the other reporting CRP differences in 70 GAD patients with and  
27 without a diagnosis of alexithymia found a significant association between higher CRP and  
28 suicidal ideation<sup>36</sup>.  
29  
30  
31

32 Although the meta-analysis and the majority of included studies reported raised CRP in  
33 GAD, there was wide variation in reporting and adjustment for important potential  
34 moderators, including co-morbid MDD, use of medications, assay used and time of day of  
35 blood collection, all of which likely contributed to the high degree of heterogeneity between  
36 studies. Of the nine studies to analyse CRP, four (44.4%) did not exclude or adjust for  
37 medication use by participants<sup>30,35,39,40</sup>. Co-morbid MDD was not adjusted for in analysis by  
38 two studies<sup>31,35</sup>, one of which was included in the meta-analysis<sup>31</sup>. Only three of the nine  
39 studies reported time of sample collection<sup>33,36,43</sup> or whether this was in a fasted state<sup>33,35,36</sup>,  
40 and though all studies utilised a similar assay method, different assay types were used in  
41 every study.  
42  
43  
44  
45  
46

47 In summary, of the nine studies to have examined differences between GAD and controls, the  
48 majority reported raised CRP in GAD and meta-analysis found significantly raised CRP in  
49 GAD with a small effect size. However, there was wide variation in study methods including  
50 variable adjustment for mediators of inflammation such as co-morbid MDD, medication use  
51 and sampling methods. Only one study examined CRP in GAD longitudinally, reporting a  
52 bivariate association accounted for by health seeking behaviours<sup>31</sup>.  
53  
54  
55  
56

## 57 Interleukins

58 Seven studies examined the association between interleukins and GAD (see Table 3). IL-6 is  
59 a mediator of T-cell and B-cell activation and induces acute phase proteins in hepatocytes,  
60

1  
2  
3 among other functions<sup>46</sup>. Pharmacological blockade of IL-6 action is used to treat several  
4 auto-immune conditions including RA, and raised IL-6 has been associated with a number of  
5 psychiatric conditions including depression, schizophrenia and PTSD<sup>46,48</sup>. We found IL-6  
6 was the most frequently measured interleukin, with five studies (n=2066) examining changes  
7 in GAD patients compared to controls<sup>33–35,37,43</sup>. The largest study investigated differences  
8 between 454 participants with a diagnosis of GAD and 556 controls from The Netherlands  
9 Study of Depression and Anxiety (NESDA) cohort<sup>33</sup>. Though analysis was conducted on  
10 anxiety disorders as a whole, mean difference in IL-6 in people with GAD compared to  
11 controls obtained through direct communication with the author showed significantly higher  
12 levels in GAD. However, it is unclear whether these differences remain significant after  
13 adjustment for group differences and no associations were found between IL-6 and  
14 participants who had all types of anxiety disorder<sup>33</sup>. Two studies<sup>34,43</sup> (n=165), one of which  
15 used saliva samples<sup>34</sup>, reported significantly higher IL-6 in medication naïve participants with  
16 a diagnosis of GAD compared to age and sex matched healthy controls.  
17  
18  
19  
20  
21  
22

23 No difference was found in a combined inflammatory index consisting of CRP, IL-6 and  
24 TNF- $\alpha$  in a study of 93 patients with GAD and co-morbid ischaemic heart disease<sup>35</sup>. One  
25 case-controlled study<sup>43</sup> of 48 Chinese outpatients presenting for the first time with a diagnosis  
26 of GAD and 48 age, sex and education matched controls accounted for all results for IL-1 $\alpha$ ,  
27 5, 8, 12p70. This study found significantly higher levels of IL-1 $\alpha$ , -8 and -12p70 in GAD  
28 patients, in addition to higher levels of IL-1 $\alpha$  and IL-8 with increased severity of GAD (as  
29 measured by GAD-7 scale), but did not account for chronic physical co-morbidities during  
30 recruitment or in analysis. Both IL-1 $\alpha$  and IL-8 have pro-inflammatory functions as chemo-  
31 attractants for leukocytes and haematopoiesis, and have been targeted for treatments in a  
32 number of auto-immune conditions<sup>46</sup>. However, there was no association between GAD and  
33 IL-5, which is thought to predominantly mediate myeloid cell activation, and is a target of  
34 treatment in asthma<sup>46</sup>. The same study<sup>43</sup> also examined IL-2, which has a major role in T-cell  
35 mediated autoimmune and inflammatory conditions<sup>46</sup>. Results showed significantly higher  
36 IL-2 in GAD patients, however, this conflicted with results from a smaller study (n=24) that  
37 found no significant difference between medication naïve GAD patients and controls, though  
38 few details of the characteristics of participants, sampling or analysis were reported in this  
39 abstract<sup>32</sup>.  
40  
41  
42  
43  
44  
45  
46

47 One study that measured IL-1 using sputum analysis found significantly higher levels in  
48 GAD compared to controls in 69 participants recruited from the same Chinese hospital<sup>34</sup>.  
49 Though IL-1 is pro-inflammatory, there are differences in function dependent on the class of  
50 IL-1 protein measured which was not reported in this study<sup>34</sup>.  
51  
52

53 IL-4 has several pro-inflammatory functions including immunoglobulin-E (Ig-E) class  
54 switching, expression of MHC class II and acts as a survival factor for T and B cells<sup>46</sup>. The  
55 only study to measure IL-4, found no differences between 54 GAD patients recruited from  
56 community mental health teams and primary care after controlling for age, sex, BMI,  
57 smoking, alcohol consumption and co-morbid depression<sup>38</sup>. This study<sup>38</sup> also investigated IL-  
58 10, which was the only cytokine with an anti-inflammatory function to be measured and is  
59  
60

involved in immunosuppression of T cell subsets and B cell immunoglobulin production. This found significantly lower levels of IL-10 (OR 0.35  $p = 0.003$ ) in GAD patients. However, this opposed findings from a smaller study ( $n=24$ ) which reported significantly higher levels of IL-10 in GAD patients compared to controls, though it was not reported whether this association remained significant after controlling for group differences<sup>32</sup>.

In summary, IL-6 was the most commonly measured interleukin raised in GAD compared to controls in the majority of studies, however, no study examined the longitudinal association with GAD. Other interleukins were examined by relatively few studies that examined small numbers cross-sectionally with mixed findings.

### IFN- $\gamma$

IFN- $\gamma$  has anti-viral roles including promoting cytotoxic activity, MHC class I and II upregulation, NK cell activation, and is a treatment target in inflammatory conditions such as Crohn's disease<sup>46</sup>. Three studies investigated IFN- $\gamma$  levels in GAD ( $n= 330$ )<sup>38,40,43</sup>. The largest study ( $n=118$ ) found higher IFN- $\gamma$  in GAD patients from the UK that remained significant after adjustment for age, gender, BMI, smoking, alcohol and co-morbid depression, but did not adjust for anxiolytic medication use in analysis<sup>38</sup>. This finding was supported by a study of 96 participants which reported higher IFN- $\gamma$  levels in GAD and a significant positive correlation between anxiety severity and IFN- $\gamma$ <sup>43</sup>. Conflicting findings were reported by a Finnish study of 116 participants, which found significantly lower IFN- $\gamma$  in GAD patients. However, the number of participants with a diagnosis of GAD, differences between groups and adjustment for potential confounders were not reported<sup>40</sup>. In summary, only a few small cross-sectional studies have examined differences in IFN- $\gamma$  between GAD and control groups, and their findings were mixed.

### TNF- $\alpha$

TNF- $\alpha$  has a wide array of roles in host defence, including initiating a strong acute inflammatory response but limiting duration of inflammatory activation, and is the target of blocking monoclonal antibodies in the treatment of a wide array of autoimmune conditions including Crohn's disease and RA<sup>46</sup>. Six studies ( $n=2300$ ) investigated TNF- $\alpha$  in GAD, with mixed findings. Three studies ( $n=303$ ) found TNF- $\alpha$  significantly raised in GAD patients compared to controls<sup>34,38,40</sup>. However, the largest study to measure TNF- $\alpha$  ( $n=1010$ ) found no difference between participants with GAD and controls, and no correlation between TNF- $\alpha$  and anxiety symptoms<sup>33</sup>. This finding was supported by a study of 93 patients with GAD and co-morbid ischaemic heart disease using a combined inflammatory index of CRP, IL-6 and TNF- $\alpha$  which reported no difference compared to controls<sup>35</sup>. In summary, though the majority of studies to measure differences in TNF- $\alpha$  between GAD and controls reported significantly raised levels, these comprised small cross-sectional studies and the largest study reported no difference.

### Other cytokines

One study compared levels of the pro-inflammatory cytokines CCL-5, MCP-1 and SDF-1 in 120 medication naïve physically well patients with a diagnosis of GAD and co-morbid

1  
2  
3 personality disorder to 40 controls<sup>42</sup>. Significantly higher levels of MCP-1 and SDF-1 were  
4 reported in both men and women, and higher CCL-5 in men but not women with a diagnosis  
5 of GAD compared to controls<sup>42</sup>.  
6  
7  
8  
9

## 10 Discussion

11  
12  
13 To our knowledge, this is the first systematic review and meta-analysis focusing on  
14 inflammatory cytokines in GAD. Using a range of databases we identified 14 studies,  
15 comprising 1188 participants with GAD and which measured 16 cytokines. We found  
16 significantly raised levels of CRP, IFN- $\gamma$  and TNF- $\alpha$  in people with GAD compared to  
17 controls which were findings replicated in two or more studies. A further 10 pro-  
18 inflammatory cytokines were reported to be significantly raised in GAD in at least one study,  
19 however, 5/14 studies found no difference in at least one cytokine.  
20  
21  
22

23  
24 Despite substantial efforts to acquire data by contacting authors, it was only possible to  
25 conduct a meta-analysis of CRP. This identified significantly higher levels in GAD compared  
26 to controls with a small effect size (SMD: 0.38), though there was evidence of significant  
27 heterogeneity across studies ( $I^2 = 75\%$ ). This effect size in CRP is greater than has been  
28 reported in other anxiety disorders (PTSD: SMD = -0.14)<sup>24</sup> or MDD (SMD= 0.14)<sup>6</sup>, and is  
29 similar to that reported in schizophrenia (SMD= 0.45)<sup>49</sup>. Though we were only able to meta-  
30 analyse CRP, meta-analyses of different cytokines in other anxiety disorders have been  
31 conducted with larger effect sizes. A meta-analysis of inflammatory markers in PTSD  
32 identified 20 studies which reported increased interleukin 6 (IL-6), interleukin 1 $\beta$  (IL-1 $\beta$ ),  
33 tumour necrosis factor- $\alpha$  (TNF $\alpha$ ), and interferon  $\gamma$  (IFN  $\gamma$ ) levels with effect sizes ranging  
34 from small (IFN  $\gamma$ : SMD 0.49) to large 1.42 (IL-1 $\beta$ : SMD 1.42)<sup>24</sup>. However, a systematic  
35 review and meta-analysis of pro-inflammatory cytokines in OCD identified 12 studies, and  
36 concluded that there was a significant reduction in IL-1 $\beta$  with moderate effect size (SMD: -  
37 0.60,  $p < 0.001$ ), and only IL-6 levels were significantly increased after subgroup analysis in  
38 medication-free adults with OCD<sup>7</sup>. It is unclear whether this profile of inflammatory marker  
39 changes would follow a similar pattern in GAD if future studies enabled further meta-  
40 analysis.  
41  
42  
43  
44  
45  
46  
47

48 However, our findings should be interpreted with caution, due to the high heterogeneity  
49 among studies, low participant numbers and inconsistent reporting and adjustment for known  
50 confounding factors such as BMI, smoking, medication use and co-morbidities. It was not  
51 possible to analyse the cause of the degree of heterogeneity due to the paucity of studies.  
52 Other known mediators of inflammation<sup>24</sup> such as physical activity, raised blood pressure and  
53 genetics were not accounted for. Furthermore, reporting of GAD severity and duration of  
54 symptoms was generally poor, preventing detailed analysis of whether inflammatory markers  
55 predicted outcomes and quality of life. We also found limitations in inclusion of specific  
56 demographics of participants with GAD. For example, despite GAD in older adults being  
57  
58  
59  
60

1  
2  
3 prevalent and often treatment resistant<sup>50,51,52</sup>, only two studies included participants over the  
4 age of 65, both of which only included patients with co-morbid ischaemic heart disease.  
5  
6

7 We are beginning to understand the interplay between cytokines, the immune system and  
8 mental health<sup>1,53</sup>. At a molecular level we are aware that pro-inflammatory cytokines,  
9 including IFN, IL-1 $\beta$  and TNF, can reduce the availability of monoamines by inducing  
10 expression of pre-synaptic reuptake pumps and inhibiting enzymes involved in monoamine  
11 synthesis<sup>54</sup>, linking the monoamine theory of anxiety with inflammatory mechanisms. There  
12 is also a growing understanding of the relationship between systemic inflammation and the  
13 central nervous system (CNS)<sup>1,55</sup>. Microglial activation has been shown to be mediated by  
14 peripheral cytokines, and increased activation has been found in post-mortem studies of  
15 patients with MDD and schizophrenia<sup>1</sup>. No study we identified correlated inflammatory  
16 marker changes with in vivo microglial activation imaging in GAD and to our knowledge no  
17 research on post-mortem microglial changes in GAD has been conducted. Increased neuronal  
18 activity has also been shown to induce inflammatory and vascular changes in the brain,  
19 suggesting that psychological stress can not only be induced by inflammation but perpetuate  
20 chronic low grade inflammation seen in other vascular and neurodegenerative disorders<sup>55</sup>.  
21 Understanding interactions between the CNS and immune system, and identifying  
22 biomarkers of GAD offers potential for novel therapeutic approaches. The revolution of  
23 development of monoclonal-antibody therapies for inflammatory disorders<sup>56</sup> raises the  
24 possibility of repurposing these medications for trials in treatment resistant GAD if specific  
25 and consistent profiles of inflammatory biomarkers are identified.  
26  
27  
28  
29  
30  
31  
32

33 However, it remains unclear as to whether inflammation plays a causal role in GAD<sup>48,54</sup>. For  
34 example, although IL-6 is a successful target for treatment in a number of auto-immune  
35 conditions and raised IL-6 is implicated in several psychiatric disorders, it also acts to reduce  
36 other pro-inflammatory cytokines such as TNF via negative feedback and is induced by  
37 physical exercise, hyperthermia, fasting, sleep deprivation and sunlight exposure without  
38 activation other pro-inflammatory cytokines<sup>48</sup>. This raises the question as to whether  
39 inflammation in GAD is a consequence rather than cause of symptoms. This will only be  
40 answered by large prospective longitudinal studies, better characterising the relationship  
41 between inflammation and GAD, and our review identified only one published study that  
42 examined inflammation in GAD patients longitudinally in a cohort of adolescents.  
43  
44  
45  
46  
47  
48  
49

## 50 **Conclusion**

51 There is some preliminary evidence to suggest a raised inflammatory response in GAD,  
52 although it is unclear whether inflammatory cytokines play a role in aetiology. GAD remains  
53 a poorly studied area of psychiatric neuroinflammatory research compared to other mental  
54 illnesses such as MDD and schizophrenia. While we are a long way from using inflammatory  
55 cytokines as a biomarker or treatment target in GAD, current findings reflect inflammatory  
56 changes seen in other mental illnesses and highlight the importance of ongoing investigation  
57 of the role inflammation plays in the development and course of GAD. Further,  
58  
59  
60

1  
2  
3 methodologically consistent, prospective, longitudinal studies examining the mechanisms and  
4 relationship between inflammation and GAD, while accounting for known mediators of  
5 cytokine production, are required.  
6  
7  
8  
9

### 10 **Funding**

11 This research received no specific grant from any funding body. HC and EA are supported by  
12 a NIHR Academic Clinical Fellowship. RG and RH are supported by the NIHR UCLH BRC  
13  
14  
15  
16  
17  
18  
19  
20  
21  
22  
23  
24  
25  
26  
27  
28  
29  
30  
31  
32  
33  
34  
35  
36  
37  
38  
39  
40  
41  
42  
43  
44  
45  
46  
47  
48  
49  
50  
51  
52  
53  
54  
55  
56  
57  
58  
59  
60

| Table 1. Study & clinical characteristics |         |                     |                                                                               | N   |            | Standardised diagnostic assessment/criteria                                                               | Anxiety measure                               | Age (years, SD)           |                                                                 | % Female |                                                    | BMI            |                                                           | Current smoking                                       | Medicated                                                            | Physical health co-morbidities                                             | Mental health co-morbidities                                                                  |
|-------------------------------------------|---------|---------------------|-------------------------------------------------------------------------------|-----|------------|-----------------------------------------------------------------------------------------------------------|-----------------------------------------------|---------------------------|-----------------------------------------------------------------|----------|----------------------------------------------------|----------------|-----------------------------------------------------------|-------------------------------------------------------|----------------------------------------------------------------------|----------------------------------------------------------------------------|-----------------------------------------------------------------------------------------------|
| Study                                     | Country | Study type          | Inflammatory markers                                                          | GAD | Control    |                                                                                                           |                                               | GAD                       | Control                                                         | GAD      | Control                                            | GAD            | Control                                                   |                                                       |                                                                      |                                                                            |                                                                                               |
| Bankier et al. 2008                       | US      | Case-control        | CRP                                                                           | 15  | 30         | SCID, DSM IV                                                                                              | nr                                            | nr                        | 67.6 (12.7)                                                     | nr       | 33%                                                | nr             | nr                                                        | GAD: nr. Controls: 10%                                | nr                                                                   | All participants had CVD. Excluded other conditions.                       | Excluded.                                                                                     |
| Copeland et al. 2012                      | US      | Cohort, prospective | CRP                                                                           | 146 | 5664       | Child and adolescent psychiatric assessment <16, Young adult psychiatric assessment >16. DSM IV criteria. | Total number of anxiety symptoms (range: 0-6) | 14.21                     | All subjects (Odds or means ratio 1.12 (1.03-1.22) with GAD dx) | 48.7%    | (Odds or means ratio 2.02 (1.04-3.92) with GAD dx) | 22.37          | (5.62) (Odds or means ratio 1.08 (1.05-1.11) with GAD dx) | Total sample: 13.5% (Odds/means ratio with GAD: 2.86) | 30.2% 'use medication' (Odds/means ratio with GAD: 2.00)             | 34.7% had 'recent health ailments'.                                        | Total sample: 39.9% co-morbid MDD.                                                            |
| De Berardis et al. 2017                   | Canada  | Cross-sectional     | CRP                                                                           | 70  | no control | SCID, DSM IV                                                                                              | HAM-A (score >20 for inclusion)               | 28.2 (5.3)                | -                                                               | 51.40%   | -                                                  | 22.1 (1.67)    | -                                                         | nr                                                    | Excluded                                                             | Excluded                                                                   | Total sample: 44.3% of participants had alexithymia. Excluded other co-morbid mental illness  |
| Hoge et al. 2016                          | US      | RCT                 | TNF- $\alpha$ , IL-6                                                          | 70  | no control | SCID, DSM IV                                                                                              | nr                                            | 39.12                     | -                                                               | 45.70%   | -                                                  | nr             | -                                                         | nr                                                    | Excluded                                                             | Excluded                                                                   | GAD: 14.3% co-morbid MDD. Excluded other co-morbid mental illness                             |
| Hou et al. 2017                           | UK      | Case-control        | IL-4, IL-10, TNF- $\alpha$ , IFN- $\gamma$                                    | 54  | 64         | MINI, DSM-IV & ICD-10 criteria                                                                            | HADS, GAD-7 (score >10 for inclusion)         | 35.06 (14.45)             | 25.75 (8.87)                                                    | 34%      | 50%                                                | 24.84 (5.70)   | 22.45 (3.27)                                              | GAD: 22% Controls: 34%                                | GAD: 67% use 'anxiolytic' medication. Excluded other medication use. | Excluded.                                                                  | Excluded                                                                                      |
| Khandaker et al. 2016                     | UK      | Cohort, prospective | CRP                                                                           | 26  | 3392       | DAWBA. DSM-IV criteria                                                                                    | DAWBA                                         | 15.56 (0.24)              | 15.53 (0.31)                                                    | 90%      | 52.30%                                             | 22.55 (3.52)   | 21.40 (3.63)                                              | nr                                                    | nr                                                                   | nr                                                                         | GAD: 30.77% co-morbid MDD. Excluded other co-morbid mental illness.                           |
| Korkelia et al. 2010                      | Finland | Cross-sectional     | CRP, TNF- $\alpha$ , IFN- $\gamma$                                            | 116 |            | MINI                                                                                                      | nr                                            | nr                        | nr                                                              | 100%     | 100%                                               | All 25.3 (5.0) | nr                                                        | Excluded                                              | nr                                                                   | nr                                                                         | nr                                                                                            |
| Nayek et al. 2016                         | India   | Case-control        | CRP                                                                           | 50  | 50         | ICD-10                                                                                                    | nr                                            | 37.96 (10.7)              | 37.00 (12.08)                                                   | 54%      | 23%                                                | nr             | nr                                                        | Excluded                                              | Excluded if using HRT or OCP. Other medications not reported.        | Excluded                                                                   | nr                                                                                            |
| Oglodek et al. 2015                       | Poland  | Case-control        | SDF-1, CCL-5, MCP-1                                                           | 120 | 40         | DSM-V                                                                                                     | nr                                            | 41.4 (3.5)                | 40.8 (3.1)                                                      | 50%      | nr                                                 | nr             | nr                                                        | nr                                                    | Excluded                                                             | Excluded                                                                   | All participants had co-morbid personality disorder. Excluded other co-morbid mental illness. |
| Tang et al. 2017                          | China   | Case-control        | CRP, IL-1 $\alpha$ , IL-2, IL-5, IL-6, IL-8, IL-12p70, IFN- $\gamma$ , GM-CSF | 48  | 48         | MINI, DSM-IV                                                                                              | GAD-7, SAI, TAI                               | 40.75 (12.21)             | 39.56 (10.06)                                                   | 58.33%   | 64.17%                                             | 22.56 (2.73)   | 22.69 (2.63)                                              | GAD: 29% Controls: 23%                                | Excluded                                                             | Excluded acute illness. Chronic co-morbidities nr.                         | Excluded                                                                                      |
| Tofani et al. 2015                        | Italy   | Case-control        | IL-2, IL-10                                                                   | 14  | 10         | MINI, DSM-IV                                                                                              | GAD-7                                         | nr                        | nr                                                              | nr       | nr                                                 | nr             | nr                                                        | nr                                                    | Excluded                                                             | nr                                                                         | Excluded                                                                                      |
| Vogelzangs et al. 2013                    | Holland | Cohort              | CRP, IL-6, TNF- $\alpha$                                                      | 454 | 556        | CIDI, DSM criteria                                                                                        | BAI                                           | Total sample: 41.8 (13.1) |                                                                 | 66.90%   |                                                    | 25.6 (5.1)     |                                                           | Total sample: 38.2%                                   | nr                                                                   | Total sample: 6.2% CVD, 4.9% diabetes, mean of 0.4 other chronic diseases. | Total sample: 58.4% co-morbid MDD. Excluded other co-morbid mental illness.                   |
| Yang et al. 2017                          | China   | Case-control        | IL-1, IL-4, TNF- $\alpha$                                                     | 28  | 41         | MINI, DSM IV                                                                                              | HAM-A                                         | 55.1 (6.9)                | 55.9 (5.6)                                                      | 53.60%   | 48.80%                                             | 22.0 (4.4)     | 22.5 (3.7)                                                | GAD: 35.7% Control: 24.4%                             | Excluded                                                             | Additional group with co-morbid asthma. Excluded other co-morbidities.     | Excluded                                                                                      |
| Zahm 2016                                 | US      | Cohort, prospective | CRP, IL-6, TNF- $\alpha$                                                      | 93  | 728        | CDIS, DSM IV                                                                                              | nr                                            | 68 (9.6)                  |                                                                 | 17%      |                                                    | nr             | nr                                                        | nr                                                    | nr                                                                   | All patients had history of CVD.                                           | GAD: 60.0% co-morbid MDD, 86.2% had lifetime history MDD.                                     |

not reported (nr), not applicable (-), sd: standard deviation, C-reactive protein (CRP), interleukin (IL), tumour necrosis factor- $\alpha$  (TNF- $\alpha$ ), interferon- $\gamma$  (IFN- $\gamma$ ), stromal derived factor-1 (SDF-1), monocyte chemoattractant protein-1 (MCP-1), chemokine C-C motif 1 Mental Disorders (DSM), International classification of diseases (ICD), Computerised diagnostic interview schedule (CDIS), Composite Interview Diagnostic Instrument (CIDI), Mini-International Neuropsychiatric Interview (MINI), Structure clinical interview for D (MADRS), Hamilton Anxiety Rating Scale (HAM-A), Hospital Anxiety and Depression Scale (HADS), Generalised Anxiety Disorder Assessment (GAD-7), State-Anxiety Inventory (SAI), Test Anxiety Inventory (TAI), Beck Anxiety Inventory (BAI), Cardiovascular disease (CVD), contraceptive pill (OCP), Hormone replacement therapy (HRT)

**Table 2. Inflammatory marker sampling and analysis**

| Study                   | GAD | Control    | Inflammatory markers                                                          | Nature of sample  | Cross-sectional or longitudinal                                | Time of day of sample      | Fasted period before sample | Assay method                                          | Assay sensitivity reported | Inflammatory marker cutoff used. | Confounding factors controlled for                                                                                                       |
|-------------------------|-----|------------|-------------------------------------------------------------------------------|-------------------|----------------------------------------------------------------|----------------------------|-----------------------------|-------------------------------------------------------|----------------------------|----------------------------------|------------------------------------------------------------------------------------------------------------------------------------------|
| Bankier et al. 2008     | 15  | 30         | CRP                                                                           | Blood             | Cross-sectional                                                | nr                         | nr                          | High sensitivity turbidometric immunoassay            | Yes                        | CRP >3mg/l for significance      | Age, sex, education, MDD, obesity, smoking history, type II diabetes mellitus, hypertension, hyperlipidaemia, other mental illness.      |
| Copeland et al. 2012    | 146 | 5664       | CRP                                                                           | Whole blood spots | Longitudinal: Sampled aged 9-16, 19, and 21 years old.         | nr                         | nr                          | Biotin-Streptavidin based Immunofluorometric system.  | Yes                        | Excluded if >10 mg/l             | Age, sex, race, SES, BMI, medication use, substance use, recent physical illness, chronic illness.                                       |
| De Berardis et al. 2017 | 70  | no control | CRP                                                                           | Serum             | Cross-sectional                                                | 7- 8.30am                  | 10 hour fast                | Highly sensitive nephelometric assay                  | Yes.                       | No                               | Age, sex, BMI, MDD, physical illness, other mental illness, medication use                                                               |
| Hoge et al. 2016        | 70  | no control | TNF- $\alpha$ , IL-6                                                          | Plasma            | Longitudinal: sampled pre- and post-psychological intervention | 1-4.30pm                   | nr                          | nr                                                    | No                         | No                               | Age, sex, ethnicity, MDD, medication use, physical illness, other mental illness                                                         |
| Hou et al. 2017         | 54  | 64         | IL-4, IL-10, TNF- $\alpha$ , IFN- $\gamma$                                    | Serum             | Cross-sectional                                                | 9-10am                     | nr                          | Multiplex ultra-sensitive immunoassay                 | Yes                        | No                               | Age, sex, BMI, smoking, alcohol consumption, MDD, physical illness, other mental illness                                                 |
| Khandaker et al. 2016   | 26  | 3392       | CRP                                                                           | Serum             | Cross-sectional                                                | nr                         | 'Overnight'                 | Automated particle-enhanced immunoturbidimetric assay | No                         | Excluded if >10 mg/l             | Age, sex, parental SES, ethnicity, maternal age at delivery, concurrent infection, family history of inflammatory disease, MDD.          |
| Korkelia et al. 2010    | 116 |            | CRP, TNF- $\alpha$ , IFN- $\gamma$                                            | Blood             | Cross-sectional                                                | nr                         | nr                          | nr                                                    | No                         | No                               | BMI                                                                                                                                      |
| Nayek et al 2016        | 50  | 50         | CRP                                                                           | Serum             | Cross-sectional                                                | nr                         | nr                          | Particle enhanced turbidimetric immunoassay technique | No                         | Excluded if 'raised ESR'         | Age, sex, SES, religion, marital status, locality, BMI >30, physical illness                                                             |
| Oglodek et al. 2015     | 120 | 40         | SDF-1, CCL-5, MCP-1                                                           | Plasma            | Cross-sectional                                                | 7-9am                      | Fasted, duration nr.        | ELISA                                                 | Yes                        | No                               | Sex, other mental illness, physical illness, substance misuse, smoking status, medication use.                                           |
| Tang et al. 2017        | 48  | 48         | CRP, IL-1 $\alpha$ , IL-2, IL-5, IL-6, IL-8, IL-12p70, IFN- $\gamma$ , GM-CSF | Serum             | Cross-sectional                                                | 9-10am                     | nr                          | ELISA                                                 | No                         | No                               | Age, sex, education, BMI, smoking status, alcohol consumption, acute physical illness, other mental illness, medication use.             |
| Tofani et al. 2015      | 14  | 10         | IL-2, IL-10                                                                   | Plasma            | Cross-sectional                                                | nr                         | nr                          | Immunoenzymatic assay                                 | No                         | No                               | Medication use.                                                                                                                          |
| Vogelzangs et al 2013   | 454 | 556        | CRP, IL-6, TNF- $\alpha$                                                      | Plasma            | Cross-sectional                                                | 8-9am                      | 'Overnight'                 | ELISA                                                 | Yes                        | No                               | Age, sex, education, smoking status, alcohol intake, physical activity, BMI, physical illness, medication use, MDD, other mental illness |
| Yang et al. 2017        | 28  | 41         | IL-1, IL-4, IL-6, TNF- $\alpha$                                               | Saliva            | Cross-sectional                                                | nr                         | 'Overnight'                 | ELISA                                                 | Yes                        | No                               | Age, sex, smoking status, BMI, medication use, physical illness, other mental illness                                                    |
| Zahm 2016               | 93  | 728        | CRP, IL-6, TNF- $\alpha$                                                      | Serum             | Cross-sectional                                                | No. (fasting, duration nr) | Fasted, duration nr.        | ELISA                                                 | Yes                        | No                               | Age, sex, SES, BMI, illicit substance use, alcohol use, smoking status, physical activity, physical illness                              |

nr (not reported), C-reactive protein (CRP), interleukin (IL), tumour necrosis factor- $\alpha$  (TNF- $\alpha$ ), interferon- $\gamma$  (IFN- $\gamma$ ), stromal derived factor-1 (SDF-1), monocyte chemoattractant protein-1 (MCP-1), chemokine C-C motif ligand 5 (CCL-5), granulocyte-macrophage colony-stimulating factor (GM-CSF), erythrocyte sedimentation rate (ESR), mg (milligrams), l (litre), socioeconomic status (SES), body mass index (BMI), major depressive disorder (MDD)



Table 3. Summary inflammatory marker findings in GAD

| Study                                                                                                                | N          |            | Finding                                                                                                                                                                              |
|----------------------------------------------------------------------------------------------------------------------|------------|------------|--------------------------------------------------------------------------------------------------------------------------------------------------------------------------------------|
|                                                                                                                      | Controls   | n with GAD |                                                                                                                                                                                      |
| <b>C-reactive protein (CRP)</b>                                                                                      |            |            |                                                                                                                                                                                      |
| Bankier et al. 2008                                                                                                  | 30         | 15         | ↑ in GAD with co-morbid CVD compared to controls using a dichotomous outcome of CRP cut off score (CRP >3mg/l).                                                                      |
| Copeland et al. 2012                                                                                                 | 5664       | 146        | Longitudinal study in adolescents: ↑ bivariate association both cross-sectionally & over time between GAD & elevated CRP, but accounted for by medication use & BMI.                 |
| De Berardis et al. 2017                                                                                              | no control | 70         | ↑ in GAD patients with co-morbid alexithymia and with increased suicidal ideation, no control group.                                                                                 |
| Khandaker et al. 2016                                                                                                | 3392       | 26         | ↑ in 16 year olds with GAD compared to controls, remained ↑ after adjusting for co-variables.                                                                                        |
| Korkelia et al. 2010                                                                                                 | 116        |            | ↓ in non-smoking women with diagnosis of GAD compared to controls, however control group not described.                                                                              |
| Nayek et al. 2016                                                                                                    | 50         | 50         | ↑ in GAD patients compared to controls.                                                                                                                                              |
| Tang et al. 2017                                                                                                     | 48         | 48         | ↑ in GAD patients compared to controls and ↑ with increased severity of GAD.                                                                                                         |
| Vogelzangs et al 2013                                                                                                | 556        | 454        | ↑ in GAD patients compared to controls in unadjusted data obtained from author.                                                                                                      |
| Zahm 2016                                                                                                            | 728        | 93         | ↔ between those with & without a current GAD diagnosis (p = 0.28) or with & without a lifetime GAD diagnosis, using a combined inflammatory index of CRP, IL-6 & TNF-α measurements. |
| <b>Interleukin 1 (IL-1)</b>                                                                                          |            |            |                                                                                                                                                                                      |
| Yang et al. 2017                                                                                                     | 41         | 28         | ↑ sputum IL-1 in patients aged 50-60 years old with GAD compared to controls.                                                                                                        |
| <b>Interleukin 1α (IL-1α)</b>                                                                                        |            |            |                                                                                                                                                                                      |
| Tang et al. 2017                                                                                                     | 48         | 48         | ↑ IL-1α in GAD patients compared to controls and ↑ with increased severity of GAD.                                                                                                   |
| <b>Interleukin 2 (IL-2)</b>                                                                                          |            |            |                                                                                                                                                                                      |
| Tang et al. 2017                                                                                                     | 48         | 48         | ↑ in GAD patients compared to controls (p < 0.001) but ↔ with severity of GAD.                                                                                                       |
| Tofani et al. 2015                                                                                                   | 10         | 14         | ↔ in GAD patients compared to controls.                                                                                                                                              |
| <b>Interleukin 4 (IL-4)</b>                                                                                          |            |            |                                                                                                                                                                                      |
| Hou et al. 2017                                                                                                      | 64         | 54         | ↔ in GAD patients compared to controls.                                                                                                                                              |
| <b>Interleukin 5 (IL-5)</b>                                                                                          |            |            |                                                                                                                                                                                      |
| Tang et al. 2017                                                                                                     | 48         | 48         | ↔ in GAD patients compared to controls, or association with severity of GAD.                                                                                                         |
| <b>Interleukin 6 (IL-6)</b>                                                                                          |            |            |                                                                                                                                                                                      |
| Hoge et al. 2016                                                                                                     | -          | 70         | No control group: RCT of psychological intervention in GAD                                                                                                                           |
| Tang et al. 2017                                                                                                     | 48         | 48         | ↑ in GAD patients compared to controls & ↑ with increased severity of GAD.                                                                                                           |
| Vogelzangs et al 2013                                                                                                | 556        | 454        | ↑ in GAD patients compared to controls in unadjusted data obtained from author, but ↔ between IL-6 & GAD compared to other anxiety disorders.                                        |
| Yang et al. 2017                                                                                                     | 41         | 28         | ↑ sputum IL-6 in GAD patients aged 50-60 years old compared to controls.                                                                                                             |
| Zahm 2016                                                                                                            | 728        | 93         | ↔ between those with & without a current GAD diagnosis or with & without a lifetime GAD diagnosis, using a combined inflammatory index of CRP, IL-6 & TNF-α measurements.            |
| <b>Interleukin 8 (IL-8)</b>                                                                                          |            |            |                                                                                                                                                                                      |
| Tang et al. 2017                                                                                                     | 48         | 48         | ↑ in GAD patients compared to controls and ↑ with increased severity of GAD.                                                                                                         |
| <b>Interleukin 10 (IL-10)</b>                                                                                        |            |            |                                                                                                                                                                                      |
| Hou et al. 2017                                                                                                      | 64         | 54         | ↓ in GAD patients compared to controls, which remained ↓ after adjustment for co-variables.                                                                                          |
| Tofani et al. 2015                                                                                                   | 10         | 14         | ↑ in GAD compared to controls.                                                                                                                                                       |
| <b>Interleukin 12p70 (IL-12p70)</b>                                                                                  |            |            |                                                                                                                                                                                      |
| Tang et al. 2017                                                                                                     | 48         | 48         | ↑ in GAD patients compared to controls but ↔ with severity of GAD.                                                                                                                   |
| <b>Interferon gamma (IFN-γ)</b>                                                                                      |            |            |                                                                                                                                                                                      |
| Hou et al. 2017                                                                                                      | 64         | 54         | ↑ in GAD patients compared to controls which remained ↑ after adjustment for co-variables.                                                                                           |
| Korkelia et al. 2010                                                                                                 | 116        |            | ↓ in non-smoking women with diagnosis of GAD compared to controls, however control group not described.                                                                              |
| Tang et al. 2017                                                                                                     | 48         | 48         | ↑ in GAD patients compared to controls and ↑ with increased severity of GAD.                                                                                                         |
| <b>Tumour necrosis factor-alpha (TNF-α)</b>                                                                          |            |            |                                                                                                                                                                                      |
| Hoge et al. 2016                                                                                                     | -          | 70         | No control group: RCT of psychological intervention in GAD                                                                                                                           |
| Hou et al. 2017                                                                                                      | 64         | 54         | ↑ in GAD patients compared to controls which remained ↑ after adjustment co-variables.                                                                                               |
| Korkelia et al. 2010                                                                                                 | 116        |            | ↑ in non-smoking women with a diagnosis of GAD compared to controls, though control group was not described.                                                                         |
| Vogelzangs et al 2013                                                                                                | 556        | 454        | ↔ in GAD patients compared to controls, & ↔ between TNF-α & GAD compared to other anxiety disorders.                                                                                 |
| Yang et al. 2017                                                                                                     | 41         | 28         | ↑ sputum TNF-α in GAD patients aged 50-60 years old compared to controls.                                                                                                            |
| Zahm 2016                                                                                                            | 728        | 93         | ↔ between those with & without a current GAD diagnosis or with & without a lifetime GAD diagnosis, using a combined inflammatory index of CRP, IL-6 & TNF-α measurements.            |
| <b>Chemokine C-C motif ligand 5 (CCL-5) / Regulated on activation, normal T cell expressed and secreted (RANTES)</b> |            |            |                                                                                                                                                                                      |
| Oglodek et al. 2015                                                                                                  | 40         | 120        | ↑ in males with GAD & comorbid personality disorder compared to controls                                                                                                             |
| <b>Monocyte chemoattractant protein-1 (MCP-1)</b>                                                                    |            |            |                                                                                                                                                                                      |
| Oglodek et al. 2015                                                                                                  | 40         | 120        | ↑ in GAD & comorbid personality disorder compared to controls                                                                                                                        |
| <b>Stromal derived factor-1 (SDF-1)</b>                                                                              |            |            |                                                                                                                                                                                      |
| Oglodek et al. 2015                                                                                                  | 40         | 120        | ↑ in GAD & comorbid personality disorder compared to controls                                                                                                                        |
| <b>Granulocyte-macrophage colony-stimulating factor (GM-CSF)</b>                                                     |            |            |                                                                                                                                                                                      |
| Tang et al. 2017                                                                                                     | 48         | 48         | ↑ in GAD patients compared to controls and ↑ with increased severity of GAD.                                                                                                         |

↑ = statistically significant increase in inflammatory marker in people with GAD compared to controls (p < 0.05), ↓ = statistically significant decrease in inflammatory marker in people with GAD compared to controls (p < 0.05), ↔ = no statistically significant difference in inflammatory marker in people with GAD compared to controls (p > 0.05), RCT = randomised controlled trial.

Table 4. Study quality assessment: Newcastle Ottawa scale

|                         | Selection                |                      |                       |                        | Comparability                      | Exposure                  |                              |                   | TOTAL stars: |
|-------------------------|--------------------------|----------------------|-----------------------|------------------------|------------------------------------|---------------------------|------------------------------|-------------------|--------------|
|                         | Adequate case definition | Cases representative | Selection of Controls | Definition of Controls | Comparability of design & analysis | Ascertainment of exposure | Same method of ascertainment | Non-response rate |              |
| Bankier et al. 2008     | ◊                        | -                    | ◊                     | ◊                      | ◊◊                                 | ◊                         | ◊                            | ◊                 | *8*          |
| Copeland et al. 2012    | ◊                        | ◊                    | ◊                     | ◊                      | ◊◊                                 | ◊                         | ◊                            | -                 | *8*          |
| De Berardis et al. 2017 | ◊                        | -                    | na                    | na                     | na                                 | ◊                         | na                           | -                 | *2*          |
| Hoge et al. 2016        | ◊                        | -                    | na                    | na                     | na                                 | ◊                         | na                           | -                 | *2*          |
| Hou et al. 2017         | ◊                        | ◊                    | ◊                     | ◊                      | ◊◊                                 | ◊                         | ◊                            | -                 | *8*          |
| Khandaker et al. 2016   | ◊                        | ◊                    | ◊                     | ◊                      | ◊◊                                 | ◊                         | ◊                            | ◊                 | *9*          |
| Korkelia et al. 2010    | ◊                        | -                    | ◊                     | -                      | ◊                                  | -                         | ◊                            | -                 | *4*          |
| Nayek et al 2016        | ◊                        | -                    | ◊                     | -                      | ◊◊                                 | ◊                         | ◊                            | -                 | *6*          |
| Oglodek et al. 2015     | ◊                        | -                    | ◊                     | ◊                      | ◊◊                                 | -                         | ◊                            | -                 | *6*          |
| Tang et al. 2017        | ◊                        | ◊                    | ◊                     | ◊                      | ◊◊                                 | ◊                         | ◊                            | -                 | *8*          |
| Tofani et al. 2015      | ◊                        | -                    | -                     | -                      | ◊                                  | ◊                         | ◊                            | -                 | *4*          |
| Vogelzangs et al 2013   | ◊                        | ◊                    | ◊                     | ◊                      | ◊◊                                 | ◊                         | ◊                            | ◊                 | *9*          |
| Yang et al. 2017        | ◊                        | ◊                    | -                     | ◊                      | ◊◊                                 | ◊                         | ◊                            | -                 | *7*          |
| Zahm 2016               | ◊                        | -                    | -                     | -                      | ◊◊                                 | ◊                         | ◊                            | -                 | *5*          |

◊ = met criteria, - = did not meet criteria, na = not applicable

review only

**Table 5. Additional critical appraisal**

|                                | Type of publication | Unrepresentative recruitment methods           | Unrepresentative demographics                           | Group differences reported | Adjusted for group differences |
|--------------------------------|---------------------|------------------------------------------------|---------------------------------------------------------|----------------------------|--------------------------------|
| <b>Bankier et al. 2008</b>     | Paper               | Yes. Recruited from cardiology clinic.         | Yes. Older cohort due to cardiac co-morbidity required. | nr                         | nr                             |
| <b>Copeland et al. 2012</b>    | Paper               | No.                                            | Yes. Aged 9-21 only.                                    | Yes                        | Yes                            |
| <b>De Berardis et al. 2017</b> | Paper               | No                                             | No (aged 18-45)                                         | No control                 | No control                     |
| <b>Hoge et al. 2016</b>        | Paper               | Yes recruited by advert as part of parent RCT  | No (aged >18)                                           | No control                 | No control                     |
| <b>Hou et al. 2017</b>         | Paper               | No                                             | No (aged 18-65)                                         | Yes                        | Yes                            |
| <b>Khandaker et al. 2016</b>   | Paper               | No                                             | Yes, aged 16 years old only                             | Yes                        | Yes                            |
| <b>Korkelia et al. 2010</b>    | Abstract            | Yes, recruited from existing study in Finland. | Yes. Non-smoking women only.                            | No                         | Yes (BMI only)                 |
| <b>Nayek et al. 2016</b>       | Paper               | Yes, inpatients only                           | No, (aged 18-65)                                        | Yes                        | Yes                            |
| <b>Oglodek et al. 2015</b>     | Paper               | Yes, co-morbid personality disorder            | No                                                      | Yes                        | No                             |
| <b>Tang et al. 2017</b>        | Paper               | No                                             | No, (aged 18-60)                                        | Yes                        | Yes                            |
| <b>Tofani et al. 2015</b>      | Abstract            | Recruitment method not stated                  | nr                                                      | nr                         | nr                             |
| <b>Vogelzangs et al. 2013</b>  | Paper               | No                                             | No (aged 18-65)                                         | Yes                        | Yes                            |
| <b>Yang et al. 2017</b>        | Paper               | No                                             | Yes, (aged 50-60).                                      | Yes                        | Yes                            |
| <b>Zahm 2016</b>               | Dissertation        | Yes, cardiology patients only.                 | Yes, (aged >50)                                         | Yes                        | Yes                            |

## References

1. Réus GZ, Fries GR, Stertz L, et al. The role of inflammation and microglial activation in the pathophysiology of psychiatric disorders. *Neuroscience*. 2015. doi:10.1016/j.neuroscience.2015.05.018
2. Brown AS, Vinogradov S, Kremen WS, et al. Prenatal exposure to maternal infection and executive dysfunction in adult schizophrenia. *Am J Psychiatry*. 2009. doi:10.1176/appi.ajp.2008.08010089
3. Benros ME, Waltoft BL, Nordentoft M, et al. Autoimmune diseases and severe infections as risk factors for mood disorders: A nationwide study. *JAMA Psychiatry*. 2013. doi:10.1001/jamapsychiatry.2013.1111
4. O'dushlaine C, Rossin L, Lee PH, et al. Psychiatric genome-wide association study analyses implicate neuronal, immune and histone pathways. *Nat Neurosci*. 2015. doi:10.1038/nn.3922
5. Khandaker GM, Cousins L, Deakin J, Lennox BR, Yolken R, Jones PB. Inflammation and immunity in schizophrenia: Implications for pathophysiology and treatment. *The Lancet Psychiatry*. 2015. doi:10.1016/S2215-0366(14)00122-9
6. Howren MB, Lamkin DM, Suls J. Associations of depression with c-reactive protein, IL-1, and IL-6: A meta-analysis. *Psychosom Med*. 2009. doi:10.1097/PSY.0b013e3181907c1b
7. Gray SM, Bloch MH. Systematic review of proinflammatory cytokines in obsessive-compulsive disorder. *Curr Psychiatry Rep*. 2012. doi:10.1007/s11920-012-0272-0
8. Munkholm K, Vinberg M, Vedel Kessing L. Cytokines in bipolar disorder: A systematic review and meta-analysis. *J Affect Disord*. 2013. doi:10.1016/j.jad.2012.06.010
9. Meyer U, Feldon J. Neural basis of psychosis-related behaviour in the infection model of schizophrenia. *Behav Brain Res*. 2009. doi:10.1016/j.bbr.2008.12.022
10. Goldsmith DR, Rapaport MH, Miller BJ. A meta-analysis of blood cytokine network alterations in psychiatric patients: Comparisons between schizophrenia, bipolar disorder and depression. In: *Molecular Psychiatry*. ; 2016. doi:10.1038/mp.2016.3
11. Rao JS, Harry GJ, Rapoport SI, Kim HW. Increased excitotoxicity and neuroinflammatory markers in postmortem frontal cortex from bipolar disorder patients. *Mol Psychiatry*. 2010. doi:10.1038/mp.2009.47
12. Khairova RA, Machado-Vieira R, Du J, Manji HK. A potential role for pro-inflammatory cytokines in regulating synaptic plasticity in major depressive disorder. *Int J Neuropsychopharmacol*. 2009. doi:10.1017/S1461145709009924
13. Kubera M, Obuchowicz E, Goehler L, Brzeszcz J, Maes M. In animal models, psychosocial stress-induced (neuro)inflammation, apoptosis and reduced neurogenesis are associated to the onset of depression. *Prog Neuro-Psychopharmacology Biol Psychiatry*. 2011. doi:10.1016/j.pnpbp.2010.08.026
14. Furtado M, Katzman MA. Neuroinflammatory pathways in anxiety, posttraumatic stress, and obsessive compulsive disorders. *Psychiatry Res*. 2015. doi:10.1016/j.psychres.2015.05.036
15. Andlin-Sobocki P, Wittchen HU. Cost of anxiety disorders in Europe. *Eur J Neurol*. 2005. doi:10.1111/j.1468-1331.2005.01196.x
16. Baxter AJ, Scott KM, Vos T, Whiteford HA. Global prevalence of anxiety disorders: A systematic review and meta-regression. *Psychol Med*. 2013. doi:10.1017/S003329171200147X
17. Bystritsky A. Treatment-resistant anxiety disorders. *Mol Psychiatry*. 2006. doi:10.1038/sj.mp.4001852
18. Bruce SE, Yonkers KA, Otto MW, et al. Influence of psychiatric comorbidity on recovery and recurrence in generalized anxiety disorder, social phobia, and panic disorder: A 12-year prospective study. *Am J Psychiatry*. 2005. doi:10.1176/appi.ajp.162.6.1179
19. Baldwin D, Woods R, Lawson R, Taylor D. Efficacy of drug treatments for generalised anxiety disorder: Systematic review and meta-analysis. *BMJ*. 2011. doi:10.1136/bmj.d1199
20. Cuijpers P, Sijbrandij M, Koole S, Huibers M, Berking M, Andersson G. Psychological treatment of

- 1 generalized anxiety disorder: A meta-analysis. *Clin Psychol Rev.* 2014. doi:10.1016/j.cpr.2014.01.002
- 2 21. Härter MC, Conway KP, Merikangas KR. Associations between anxiety disorders and physical illness.
- 3 *Eur Arch Psychiatry Clin Neurosci.* 2003. doi:10.1007/s00406-003-0449-y
- 4 22. Roy-Byrne PP, Davidson KW, Kessler RC, et al. Anxiety disorders and comorbid medical illness. *Gen*
- 5 *Hosp Psychiatry.* 2008. doi:10.1016/j.genhosppsych.2007.12.006
- 6 23. Uguz F, Akman C, Kucuksarac S, Tufekci O. Anti-tumor necrosis factor- $\alpha$  therapy is associated with
- 7 less frequent mood and anxiety disorders in patients with rheumatoid arthritis. *Psychiatry Clin*
- 8 *Neurosci.* 2009. doi:10.1111/j.1440-1819.2008.01905.x
- 9 24. Passos IC, Vasconcelos-Moreno MP, Costa LG, et al. Inflammatory markers in post-traumatic stress
- 10 disorder: A systematic review, meta-analysis, and meta-regression. *The Lancet Psychiatry.* 2015.
- 11 doi:10.1016/S2215-0366(15)00309-0
- 12 25. Michopoulos V, Powers A, Gillespie CF, Ressler KJ, Jovanovic T. Inflammation in Fear-and Anxiety-
- 13 Based Disorders: PTSD, GAD, and beyond. *Neuropsychopharmacology.* 2017.
- 14 doi:10.1038/npp.2016.146
- 15 26. Liberati A, Altman DG, Tetzlaff J, et al. The PRISMA statement for reporting systematic reviews and
- 16 meta-analyses of studies that evaluate health care interventions: explanation and elaboration. In:
- 17 *Journal of Clinical Epidemiology.* ; 2009. doi:10.1016/j.jclinepi.2009.06.006
- 18 27. Spitzer R, Williams J, Gibbon M, First M. Structured Clinical Interview for DSM-IV. In: *Encyclopedia of*
- 19 *Behavioral Medicine.* ; 1994. doi:10.1007/978-1-4419-1005-9\_66
- 20 28. Wells G, Shea B, O'Connell D, et al. *The Newcastle-Ottawa Scale (NOS) for Assessing the Quality of*
- 21 *Nonrandomized Studies in Meta-Analyses.*; 2013. doi:10.2307/632432
- 22 29. Higgins JPT. Measuring inconsistency in meta-analyses. *BMJ.* 2003. doi:10.1136/bmj.327.7414.557
- 23 30. Bankier B, Barajas J, Martinez-Rumayor A, Januzzi JL. Association between C-reactive protein and
- 24 generalized anxiety disorder in stable coronary heart disease patients. *Eur Heart J.*
- 25 2008;29(18):2212-2217. doi:10.1093/eurheartj/ehn326
- 26 31. Copeland WE, Shanahan L, Worthman C, Angold A, Costello EJ. Generalized anxiety and C-reactive
- 27 protein levels: A prospective, longitudinal analysis. *Psychol Med.* 2012;42(12):2641-2650.
- 28 doi:10.1017/S0033291712000554
- 29 32. Tofani T, Pallanti S, Di Cesare Mannelli L, Zanardelli M, Ghelardini C. An immunologic profile study in
- 30 drug-naive generalized anxiety non depressed patients: A pilot study. *Eur Neuropsychopharmacol.*
- 31 2015;25.
- 32 33. Vogelzangs N, Beekman ATF, de Jonge P, Penninx BWJH. Anxiety disorders and inflammation in a
- 33 large adult cohort. *Transl Psychiatry.* 2013;3:e249. doi:10.1038/tp.2013.27
- 34 34. Yang CJ, Liu D, Du YJ, Xu ZS, Shi SX. The pro-inflammatory cytokines, salivary cortisol and alpha-
- 35 amylase are associated with generalized anxiety disorder (GAD) in patients with asthma. *Neurosci*
- 36 *Lett.* 2017;656:15-21. doi:10.1016/j.neulet.2017.07.021
- 37 35. Zahm JL. Generalized anxiety disorder and inflammatory biomarkers in coronary heart disease: Sex-
- 38 specific effects. *Diss Abstr Int Sect B Sci Eng.* 2018;78(12).
- 39 36. De Berardis D, Serroni N, Campanella D, et al. Alexithymia, suicide ideation, C-Reactive Protein, and
- 40 serum lipid levels among outpatients with generalized anxiety disorder. *Arch Suicide Res.*
- 41 2017;21(1):100-112. doi:10.1080/13811118.2015.1004485
- 42 37. Hoge EA, Bui E, Palitz SA, et al. The effect of mindfulness meditation training on biological acute
- 43 stress responses in generalized anxiety disorder. *Psychiatry Res.* 2017;No.
- 44 doi:10.1016/j.psychres.2017.01.006
- 45 38. Hou R, Garner M, Holmes C, et al. Peripheral inflammatory cytokines and immune balance in
- 46 Generalised Anxiety Disorder: Case-controlled study. *Brain Behav Immun.* 2017;62:212-218.
- 47 doi:10.1016/j.bbi.2017.01.021
- 48 39. Khandaker GM, Jones PB, Zammit S, Lewis G. Association between serum C-reactive protein and
- 49 DSM-IV generalized anxiety disorder in adolescence: Findings from the ALSPAC cohort. *Neurobiol*
- 50 *Stress.* 2016;4:55-61. doi:10.1016/j.ynstr.2016.02.003
- 51 40. Korkeila J, Runsten S, Ollikainen S, Korkeila K. Generalized anxiety disorder and immunity markers in
- 52 a stratified population sample. *Eur Psychiatry.* 2010;25. doi:10.1016/S0924-9338%2810%2971560-1

- 1 41. Nayek S, Ghosh S. A Comparative Study Of Serum C-Reactive Protein In Patients With Generalised  
2 Anxiety Disorder And Depression. *Indian J Psychiatry*. 2017;59(6, 2):S217.
- 3 42. Oglodek EA, Szota AM, Araszkiwicz A, Just MJ, Mos DM. The MCP-1, CCL-5 and SDF-1 chemokines  
4 as pro-inflammatory markers in generalized anxiety disorder and personality disorders. *Pharmacol*  
5 *Reports*. 2015;67(1):85-89. doi:10.1016/j.pharep.2014.08.006
- 6 43. Tang Z, Ye G, Chen X, et al. Peripheral proinflammatory cytokines in Chinese patients with  
7 generalised anxiety disorder. *J Affect Disord*. 2018;225:593-598. doi:10.1016/j.jad.2017.08.082
- 8 44. Kitahara CM, Trabert B, Katki HA, et al. Body mass index, physical activity, and serum markers of  
9 inflammation, immunity, and insulin resistance. *Cancer Epidemiol Biomarkers Prev*. 2014.  
10 doi:10.1158/1055-9965.EPI-14-0699-T
- 11 45. Petrovsky N, McNair P, Harrison LC. Diurnal rhythms of pro-inflammatory cytokines: Regulation by  
12 plasma cortisol and therapeutic implications. *Cytokine*. 1998. doi:10.1006/cyto.1997.0289
- 13 46. Akdis M, Aab A, Altunbulakli C, et al. Interleukins (from IL-1 to IL-38), interferons, transforming  
14 growth factor  $\beta$ , and TNF- $\alpha$ : Receptors, functions, and roles in diseases. *J Allergy Clin Immunol*. 2016.  
15 doi:10.1016/j.jaci.2016.06.033
- 16 47. Sterne JAC, Sutton AJ, Ioannidis JPA, et al. Recommendations for examining and interpreting funnel  
17 plot asymmetry in meta-analyses of randomised controlled trials. *BMJ*. 2011.  
18 doi:10.1136/bmj.d4002
- 19 48. Raison CL, Knight JM, Pariante C. Interleukin (IL)-6: A good kid hanging out with bad friends (and why  
20 sauna is good for health). *Brain, Behavior, and Immunity*. 2018.
- 21 49. Miller BJ, Culpepper N, Rapaport MH. C-reactive protein levels in schizophrenia: A review and meta-  
22 analysis. *Clin Schizophr Relat Psychoses*. 2014. doi:10.3371/CSRP.MICU.020813
- 23 50. Byers AL, Yaffe K, Covinsky KE, Friedman MB, Bruce ML. High occurrence of mood and anxiety  
24 disorders among older adults: The National Comorbidity Survey Replication. *Arch Gen Psychiatry*.  
25 2010. doi:10.1001/archgenpsychiatry.2010.35
- 26 51. Wolitzky-Taylor KB, Castriotta N, Lenze EJ, Stanley MA, Craske MG. Anxiety disorders in older adults:  
27 A comprehensive review. *Depress Anxiety*. 2010. doi:10.1002/da.20653
- 28 52. Wetherell JL, Liu L, Patterson TL, et al. Acceptance and Commitment Therapy for Generalized  
29 Anxiety Disorder in Older Adults: A Preliminary Report. *Behav Ther*. 2011.  
30 doi:10.1016/j.beth.2010.07.002
- 31 53. Felger JC, Lotrich FE. Inflammatory cytokines in depression: Neurobiological mechanisms and  
32 therapeutic implications. *Neuroscience*. 2013. doi:10.1016/j.neuroscience.2013.04.060
- 33 54. Miller AH, Raison CL. The role of inflammation in depression: From evolutionary imperative to  
34 modern treatment target. *Nat Rev Immunol*. 2016. doi:10.1038/nri.2015.5
- 35 55. Xanthos DN, Sandkühler J. Neurogenic neuroinflammation: Inflammatory CNS reactions in response  
36 to neuronal activity. *Nat Rev Neurosci*. 2014. doi:10.1038/nrn3617
- 37 56. Reichert JM, Rosensweig CJ, Faden LB, Dewitz MC. Monoclonal antibody successes in the clinic. *Nat*  
38 *Biotechnol*. 2005. doi:10.1038/nbt0905-1073
- 39
- 40
- 41
- 42
- 43
- 44
- 45
- 46
- 47
- 48
- 49
- 50
- 51
- 52
- 53
- 54
- 55
- 56
- 57
- 58
- 59
- 60

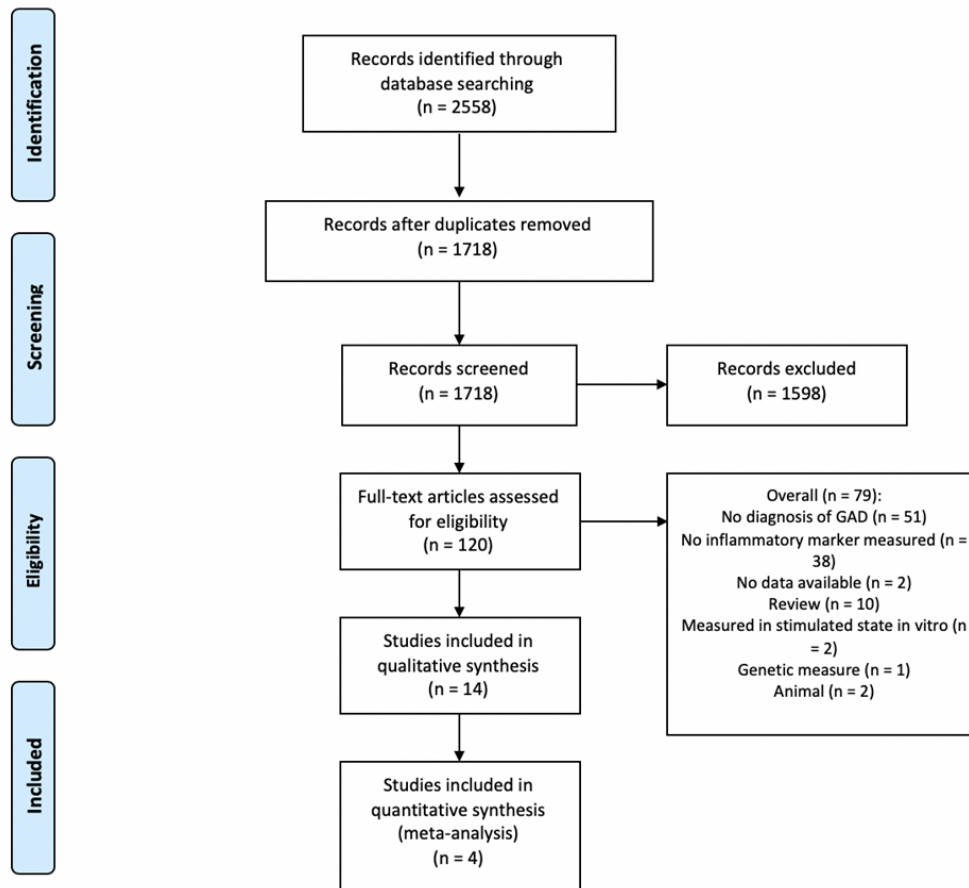

35  
36  
37  
38  
39  
40  
41  
42  
43  
44  
45  
46  
47  
48  
49  
50  
51  
52  
53  
54  
55  
56  
57  
58  
59  
60

Figure 1. Flow of studies in the systematic review and meta-analysis.

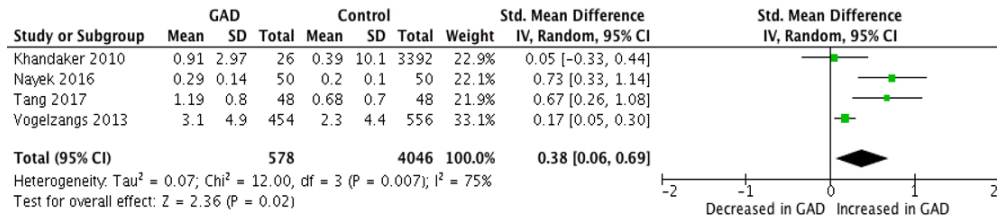

Figure 2. Forest plot of random effects meta-analysis of CRP levels in GAD vs controls.



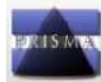

# PRISMA 2009 Checklist

| Section/topic                      | #  | Checklist item                                                                                                                                                                                                                                                                                              | Reported on page # |
|------------------------------------|----|-------------------------------------------------------------------------------------------------------------------------------------------------------------------------------------------------------------------------------------------------------------------------------------------------------------|--------------------|
| <b>TITLE</b>                       |    |                                                                                                                                                                                                                                                                                                             |                    |
| Title                              | 1  | Identify the report as a systematic review, meta-analysis, or both.                                                                                                                                                                                                                                         | 1                  |
| <b>ABSTRACT</b>                    |    |                                                                                                                                                                                                                                                                                                             |                    |
| Structured summary                 | 2  | Provide a structured summary including, as applicable: background; objectives; data sources; study eligibility criteria, participants, and interventions; study appraisal and synthesis methods; results; limitations; conclusions and implications of key findings; systematic review registration number. | 2                  |
| <b>INTRODUCTION</b>                |    |                                                                                                                                                                                                                                                                                                             |                    |
| Rationale                          | 3  | Describe the rationale for the review in the context of what is already known.                                                                                                                                                                                                                              | 2-3                |
| Objectives                         | 4  | Provide an explicit statement of questions being addressed with reference to participants, interventions, comparisons, outcomes, and study design (PICOS).                                                                                                                                                  | 3-4                |
| <b>METHODS</b>                     |    |                                                                                                                                                                                                                                                                                                             |                    |
| Protocol and registration          | 5  | Indicate if a review protocol exists, if and where it can be accessed (e.g., Web address), and, if available, provide registration information including registration number.                                                                                                                               | 3-4                |
| Eligibility criteria               | 6  | Specify study characteristics (e.g., PICOS, length of follow-up) and report characteristics (e.g., years considered, language, publication status) used as criteria for eligibility, giving rationale.                                                                                                      | 4                  |
| Information sources                | 7  | Describe all information sources (e.g., databases with dates of coverage, contact with study authors to identify additional studies) in the search and date last searched.                                                                                                                                  | 4                  |
| Search                             | 8  | Present full electronic search strategy for at least one database, including any limits used, such that it could be repeated.                                                                                                                                                                               | 4                  |
| Study selection                    | 9  | State the process for selecting studies (i.e., screening, eligibility, included in systematic review, and, if applicable, included in the meta-analysis).                                                                                                                                                   | 4                  |
| Data collection process            | 10 | Describe method of data extraction from reports (e.g., piloted forms, independently, in duplicate) and any processes for obtaining and confirming data from investigators.                                                                                                                                  | 4                  |
| Data items                         | 11 | List and define all variables for which data were sought (e.g., PICOS, funding sources) and any assumptions and simplifications made.                                                                                                                                                                       | 4                  |
| Risk of bias in individual studies | 12 | Describe methods used for assessing risk of bias of individual studies (including specification of whether this was done at the study or outcome level), and how this information is to be used in any data synthesis.                                                                                      | 5                  |
| Summary measures                   | 13 | State the principal summary measures (e.g., risk ratio, difference in means).                                                                                                                                                                                                                               | 5                  |
| Synthesis of results               | 14 | Describe the methods of handling data and combining results of studies, if done, including measures of consistency (e.g., I <sup>2</sup> ) for each meta-analysis.                                                                                                                                          | 5                  |

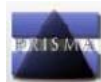

# PRISMA 2009 Checklist

Page 1 of 2

| Section/topic                 | #  | Checklist item                                                                                                                                                                                           | Reported on page # |
|-------------------------------|----|----------------------------------------------------------------------------------------------------------------------------------------------------------------------------------------------------------|--------------------|
| Risk of bias across studies   | 15 | Specify any assessment of risk of bias that may affect the cumulative evidence (e.g., publication bias, selective reporting within studies).                                                             | 4-5                |
| Additional analyses           | 16 | Describe methods of additional analyses (e.g., sensitivity or subgroup analyses, meta-regression), if done, indicating which were pre-specified.                                                         | 5                  |
| <b>RESULTS</b>                |    |                                                                                                                                                                                                          |                    |
| Study selection               | 17 | Give numbers of studies screened, assessed for eligibility, and included in the review, with reasons for exclusions at each stage, ideally with a flow diagram.                                          | 5                  |
| Study characteristics         | 18 | For each study, present characteristics for which data were extracted (e.g., study size, PICOS, follow-up period) and provide the citations.                                                             | 5                  |
| Risk of bias within studies   | 19 | Present data on risk of bias of each study and, if available, any outcome level assessment (see item 12).                                                                                                | 5-6                |
| Results of individual studies | 20 | For all outcomes considered (benefits or harms), present, for each study: (a) simple summary data for each intervention group (b) effect estimates and confidence intervals, ideally with a forest plot. | 6                  |
| Synthesis of results          | 21 | Present results of each meta-analysis done, including confidence intervals and measures of consistency.                                                                                                  | 6                  |
| Risk of bias across studies   | 22 | Present results of any assessment of risk of bias across studies (see Item 15).                                                                                                                          | 5-6                |
| Additional analysis           | 23 | Give results of additional analyses, if done (e.g., sensitivity or subgroup analyses, meta-regression [see Item 16]).                                                                                    | na                 |
| <b>DISCUSSION</b>             |    |                                                                                                                                                                                                          |                    |
| Summary of evidence           | 24 | Summarize the main findings including the strength of evidence for each main outcome; consider their relevance to key groups (e.g., healthcare providers, users, and policy makers).                     | 6-11               |
| Limitations                   | 25 | Discuss limitations at study and outcome level (e.g., risk of bias), and at review-level (e.g., incomplete retrieval of identified research, reporting bias).                                            | 6-11               |
| Conclusions                   | 26 | Provide a general interpretation of the results in the context of other evidence, and implications for future research.                                                                                  | 11-12              |
| <b>FUNDING</b>                |    |                                                                                                                                                                                                          |                    |
| Funding                       | 27 | Describe sources of funding for the systematic review and other support (e.g., supply of data); role of funders for the systematic review.                                                               | 12                 |

From: Moher D, Liberati A, Tetzlaff J, Altman DG, The PRISMA Group (2009). Preferred Reporting Items for Systematic Reviews and Meta-Analyses: The PRISMA Statement. PLoS Med 6(7): e1000097. doi:10.1371/journal.pmed1000097

For more information, visit: [www.prisma-statement.org](http://www.prisma-statement.org).

Page 2 of 2

For peer review only - <http://bmjopen.bmj.com/site/about/guidelines.xhtml>

# BMJ Open

## A systematic review and meta-analysis of the association between peripheral inflammatory cytokines and generalised anxiety disorder

|                                 |                                                                                                                                                                                                                                                                |
|---------------------------------|----------------------------------------------------------------------------------------------------------------------------------------------------------------------------------------------------------------------------------------------------------------|
| Journal:                        | <i>BMJ Open</i>                                                                                                                                                                                                                                                |
| Manuscript ID                   | bmjopen-2018-027925.R1                                                                                                                                                                                                                                         |
| Article Type:                   | Research                                                                                                                                                                                                                                                       |
| Date Submitted by the Author:   | 03-Apr-2019                                                                                                                                                                                                                                                    |
| Complete List of Authors:       | Costello, Harry; University College London Division of Psychiatry, Gould, Rebecca; University College London Division of Psychiatry Abrol, Esha; University College London Division of Psychiatry Howard, R; University College London, Division of Psychiatry |
| <b>Primary Subject Heading</b>: | Mental health                                                                                                                                                                                                                                                  |
| Secondary Subject Heading:      | Immunology (including allergy)                                                                                                                                                                                                                                 |
| Keywords:                       | Anxiety disorders < PSYCHIATRY, Immunology < BASIC SCIENCES, PSYCHIATRY                                                                                                                                                                                        |
|                                 |                                                                                                                                                                                                                                                                |

SCHOLARONE™  
Manuscripts

1  
2  
3  
4  
5  
6  
7  
8  
9  
10  
11  
12  
13  
14  
15  
16  
17  
18  
19  
20  
21  
22  
23  
24  
25  
26  
27  
28  
29  
30  
31  
32  
33  
34  
35  
36  
37  
38  
39  
40  
41  
42  
43  
44  
45  
46  
47  
48  
49  
50  
51  
52  
53  
54  
55  
56  
57  
58  
59  
60

# A systematic review and meta-analysis of the association between peripheral inflammatory cytokines and generalised anxiety disorder

---

H. Costello<sup>1</sup>, R.L. Gould<sup>1</sup>, E. Abrol, R.J. Howard<sup>1</sup>

<sup>1</sup> Division of Psychiatry, University College London, London W1T 7NF, United Kingdom

\* Corresponding author: Dr. Harry Costello  
(<mailto:harry.costello@ucl.ac.uk>)

4362 words (excluding abstract: 300 words)

## Abstract

**Objective:** Inflammation has been implicated in the aetiology of mental illness. We conducted the first systematic review and meta-analysis of the association between peripheral markers of inflammation and generalised anxiety disorder (GAD).

**Design:** Systematic review and meta-analysis of studies measuring peripheral cytokine levels in people with GAD compared to controls.

**Data sources:** MEDLINE(1950–), EMBASE(1947–), PsycINFO(1872–) and Web of Science(1945–) databases up until January 2018.

**Eligibility criteria:** Primary, quantitative research studies of people with a diagnosis of GAD assessed using a standardised clinical interview that measured peripheral inflammatory markers.

**Data extraction and synthesis:** Two independent reviewers extracted data and assessed study quality. Meta-analysis using a random-effects model was conducted for individual cytokines where data from three or more studies were available.

**Results:** 14/1718 identified studies met inclusion criteria, comprising 1188 patients with GAD and 10,623 controls. In total 16 cytokines were evaluated. Significantly raised levels of CRP, IFN- $\gamma$  and TNF- $\alpha$  were reported in GAD patients compared to controls in two or more studies. Ten further pro-inflammatory cytokines were reported to be significantly raised in GAD in at least one study. However, 5/14 studies found no difference in levels of at least one cytokine. Only CRP studies reported sufficient data for meta-analysis. CRP was significantly higher in people with GAD compared to controls, with a small effect size (Cohen's  $d = 0.38$ ,  $0.06-0.69$ ), comparable to that reported in schizophrenia. However, heterogeneity was high ( $I^2 = 75\%$ ), in keeping with meta-analyses of inflammation in other psychiatric conditions and reflecting differences in participant medication use, co-morbid depression and cytokine sampling methodology.

**Conclusion:** There is preliminary evidence to suggest an inflammatory response in GAD, but it remains unclear whether inflammatory cytokines play a role in aetiology. GAD remains a poorly studied area of neuroinflammation compared to other mental disorders and further longitudinal studies are required.

### Strengths and limitations of this study

- This is the first study to conduct a comprehensive systematic review and meta-analysis of peripheral inflammatory markers in generalised anxiety disorder.
- A wide range of databases were searched, and a large number of papers screened for inclusion in the study, 14 of which were subjected to quality assessment and detailed critical appraisal.
- It was only possible to conduct a meta-analysis of C-reactive protein, and it was not possible to examine publication bias due to the limited number of studies identified for inclusion in the meta-analysis.
- The high levels of heterogeneity across studies mean that findings should be interpreted with caution.

## Introduction

There is growing evidence for immune mediated pathogenic mechanisms in several psychiatric disorders with discrete profiles of inflammatory mechanisms<sup>1</sup>. Epidemiological evidence has shown an increased risk of mood disorders and psychosis in people with a history of severe infection or autoimmune conditions<sup>2,3</sup>. This has been supported by genome wide association studies implicating multiple immune signalling pathways<sup>4</sup>, and altered profiles of pro-inflammatory cytokines and acute phase reactants in schizophrenia<sup>5</sup>, depression<sup>6</sup>, obsessive compulsive disorder (OCD)<sup>7</sup> and bipolar disorder<sup>8</sup>. However, the relationship between inflammation and mental illness remains poorly understood and controversial, with a number of proposed potential neuropathological mechanisms<sup>9,10</sup>, including changes in microglial function<sup>1</sup>, glutamatergic excitotoxicity<sup>11</sup>, synaptic plasticity<sup>12</sup> and reduced hippocampal neurogenesis<sup>13</sup>.

Despite increasing interest in the role of inflammation in mental illness, relatively little research has focused on potential associations with anxiety disorders<sup>14</sup>. These are common, with an estimated lifetime prevalence of 7.3% to 28.8%, are associated with substantial functional impairment and are estimated to cost between 42-47 billion dollars to the U.S economy each year<sup>15,16</sup>. However, only 60% of patients are thought to respond to pharmacological and psychological treatments and understanding of the underlying pathophysiological mechanisms of anxiety disorders remains poor<sup>17</sup>.

Generalised anxiety disorder (GAD) is the most common anxiety disorder, with a degree of associated disability equivalent to that of major depressive disorder (MDD)<sup>18</sup>. Despite psychopharmacological<sup>19</sup> and psychological<sup>20</sup> treatments showing effectiveness in GAD, 42% of people living with GAD experience ongoing symptoms after 12 years and half of remitted patients experience recurrence<sup>18</sup>. GAD is more prevalent in those with inflammatory conditions such as rheumatoid arthritis (RA)<sup>21,22</sup>, with case series studies suggesting symptoms are less common with immune modulating treatment targeting specific inflammatory cytokines<sup>23</sup>. The chronic clinical course and relatively high probability of recurrence in GAD, in addition to preliminary evidence of an inflammatory component in other anxiety disorders<sup>7,24</sup>, suggest that inflammation could be an important neurobiological mechanism in the aetiology of this disorder.

To date, two previous reviews of inflammatory biomarkers in GAD have been conducted. Of these, however, one was a narrative review<sup>25</sup> and the other was restricted to literature published within the last decade<sup>14</sup>, and with a focus on all anxiety disorders. Both reviews reported that there was preliminary evidence for inflammatory changes in GAD. However, only three studies were identified by the systematic review reporting cytokine changes in GAD and no meta-analysis was performed. No study to date has conducted a comprehensive systematic review and meta-analysis of all current literature focusing on GAD or commented on the longitudinal association between inflammation and GAD.

We aimed to systematically review the cross-sectional and longitudinal associations between inflammatory biomarkers and GAD, and perform the first meta-analysis of inflammatory biomarkers in GAD.

## Method

We conducted a systematic review of studies that had included people with GAD who had undergone peripheral cytokines measurement and a between group meta-analysis of cytokine levels in people with GAD compared to controls. We conducted the study according to Preferred Reporting Items for Systematic Reviews and Meta-analyses (PRISMA) guidelines<sup>26</sup>.

We searched MEDLINE (1950–), EMBASE (1947–), PsycINFO (1872–) and Web of Science (1945–) databases up until January 2018. Reference lists of eligible studies were then searched for further ones that met eligibility criteria.

Our search terms (see appendix 1 for further details) were: (inflammat\* or cytokine or interferon or IFN or interleukin or “translocator protein” or TSPO or “tumour necrosis factor” or “tumor necrosis factor” or TNF or IL-1 or IL-2 or IL-4 or IL-7 or IL-6 or IL-8 or IL-10 or microglia or t-cell or lymphocyte or “C-reactive protein” or “C reactive protein” or CRP or “acute phase protein” or “fibrinogen”) and (“generalised anxiety disorder” or “generalized anxiety disorder” or GAD or worry).

We included primary, quantitative research studies (including unpublished theses and dissertations), written in any language, that included people with a diagnosis of GAD assessed using standardised clinical interview (e.g. Structured Clinical Interview for DSM<sup>27</sup>) or standardised psychometric instruments. Studies reported cross-sectional or longitudinal data in clinical or community populations. Cross-sectional studies measured inflammatory biomarker concentrations in anxious people versus non-anxious healthy controls, while longitudinal studies measured inflammatory biomarker concentrations at baseline and anxiety scores at follow-up. Inflammatory markers were measured in the unstimulated state (no antigen induced stimulation of cytokine production) and sampled from peripheral blood, CSF, or saliva at any time of day. Exclusion criteria included studies with less than 5 participants, studies in animals and studies where subjects were participants in the treatment arms of clinical trials.

## Patient and public involvement

There was no patient or public involvement in the study.

## Data extraction and quality assessment

Data were extracted and quality assessed for all studies that met eligibility criteria by two independent raters (HC, EA) with disagreements settled by consensus and discussion. For each cytokine, we extracted the means, variance estimates or 95% confidence intervals (CIs) and sample size for GAD and control groups. We also extracted demographic data (e.g. age,

1  
2  
3 sex) and clinical data (e.g. medication use, co-morbid depression, severity) where available.  
4 Authors were contacted for further information, where necessary.  
5  
6

7 Risk of bias and study quality were evaluated using the Newcastle–Ottawa Quality  
8 Assessment Scale<sup>28</sup>. Other potential confounding factors (including assay type and  
9 sensitivity, inflammatory marker analysis and recruitment methods) were also examined to  
10 allow more detailed bias and quality analysis of studies.  
11  
12  
13

### 14 Strategy for data synthesis

15 Separate meta-analyses were performed for individual biomarkers in GAD versus controls if  
16 sufficient data were available from a minimum of three studies. Due to different  
17 measurement methods and anticipated high heterogeneity, we estimated a standardised mean  
18 difference (SMD) for each inflammatory marker, and used a random effects model for meta-  
19 analysis, conducted using Revman 5. Heterogeneity across studies was quantified with the I<sup>2</sup>  
20 statistic, with a value of 25% typically regarded as low, 50% as medium, and 75% as high<sup>29</sup>.  
21 If studies were longitudinal or trials of interventions with multiple data collection points, we  
22 examined baseline data only to avoid skewed meta-analysis from inclusion of more than one  
23 effect size from the same study.  
24  
25  
26  
27  
28  
29

## 30 Results

### 31 Systematic review

32 We identified 1718 papers, excluded 1598 of these by titles and abstracts, and retrieved the  
33 remaining 120 papers, of which 14 met eligibility criteria and were included in the final  
34 systematic review (see Figure 1). The primary reasons for rejection were that no diagnosis of  
35 GAD was recorded or no inflammatory marker was measured.  
36  
37  
38  
39

40 Characteristics of the 14 included studies are shown in Tables 1 and 2. Studies comprised a  
41 total of 1188 people with a diagnosis of GAD and 10,623 controls, with a further 116  
42 participants from a study that did not report GAD and control group sizes.  
43  
44

45 In total, 16 different cytokines were evaluated (see Table 2) C-reactive protein (CRP) (9/14  
46 studies, 64.2%), tumour necrosis factor- $\alpha$  (TNF- $\alpha$ ) (6/14 studies, 42.9%), IL-6 (5/14 studies,  
47 35.7%) and interferon- $\gamma$  (IFN- $\gamma$ ) (3/14 studies, 21.4%) were most commonly studied. All  
48 other cytokines were only analysed in two or less studies.  
49  
50  
51

52 Twelve studies (85.7%) reported the assay method used, all of which were versions of an  
53 enzyme-linked immunosorbent assay (ELISA) or enzyme immunoassay (EIA). However,  
54 only 7 studies (50%) reported assay sensitivity. All but one study used blood component  
55 samples to assess inflammatory marker levels, with the most common sample type being  
56 serum (N=6, 42.9%) and plasma (N=4, 28.6%).  
57  
58  
59  
60



## Risk of bias and quality in individual studies

All included studies had adequate case definition, with participants meeting diagnostic criteria for GAD according to DSM or ICD, with 12 studies (85.7%) using a structured clinical interview for assessment (see Table 1).

Most (71.4%) studies included people aged 18-65, but two studies (14.3%) only included participants over the age of 50 and a further two studies (14.3%) used adolescent participant cohorts. The majority (78.6%) of studies accounted for age and sex differences in their analyses. Only 8/14 studies (57.1%) recorded participants' body mass index (BMI) which is known to correlate with inflammation, and only half of these accounted for BMI differences in analysis of group differences<sup>30</sup> (see Table 2).

Use of psychotropic medication and presence of comorbid major depressive disorder are important moderators of inflammation in other psychiatric disorders<sup>24</sup>. Six studies (42.8%) excluded patients who used psychiatric or other immune-modulating medication, though only two studies (4.3%) reported medication use. The majority of studies (64.2%) either excluded patients with co-morbid MDD or adjusted for this in analyses.

Concurrent physical illness is clearly an important determinant of inflammatory cytokine levels and this was accounted for by the majority of included studies by either excluding participants with co-morbidities (5 studies, 35.7%) or adjusting for chronic physical illness in group comparisons (6 studies, 42.8%), though two studies specifically only included participants with co-morbid cardiovascular disease. Use of a pre-determined cut-off value for cytokine levels was employed by three studies (21.4%) to ensure that cases with acute infection were excluded from the sample.

Many inflammatory markers exhibit a diurnal pattern of expression and are affected by consumption of food, thus time of day of sampling and whether the sample was taken in a fasted state are important factors to consider in analysing relative levels of cytokines<sup>31</sup>. However, time of day of sampling was only recorded in a minority of studies (6 studies, 42.8%), and the same number of studies recorded whether fasted samples were taken.

The overall quality of studies included in the review varied significantly, with Newcastle-Ottawa scale scores ranging from 2 to 9 (see Table 3). The area in which most studies were inadequate was in reporting non-response rate and detailing recruitment methods (see Table 3). Lowest quality studies were abstracts or dissertations, and two studies lacked control groups as only GAD patients were sampled (see Table 4).

## C-reactive protein

CRP is a critical early pro-inflammatory surveillance molecule involved in the activation of the complement system and both innate and adaptive immune systems<sup>32</sup>. We identified nine studies that investigated the association between GAD and CRP, comprising a total of 11,486 participants (see Table 5).

Four studies, involving 578 GAD patients and 4046 controls, provided sufficient information to conduct a meta-analysis of CRP levels in GAD<sup>33-36</sup> (see Figure 2). This was the only

1  
2  
3 inflammatory marker for which meta-analysis was possible. Meta-analysis showed  
4 significantly raised CRP in GAD compared to controls (SMD 0.38, 95% CI 0.06-0.69;  
5  $Z=2.36$ ,  $p=0.02$ ). However, there was a large and statistically significant degree of  
6 heterogeneity between studies ( $\text{Chi}^2=12.0$ ;  $\text{df}=3$ ;  $p=0.007$ ;  $I^2 = 75\%$ ). Given the high  
7 heterogeneity and inclusion of less than 10 studies in the meta-analysis we did not have  
8 sufficient power to examine publication bias<sup>37</sup>. Two out of four studies were high quality,  
9 scoring 9 on the Newcastle-Ottawa scale, and examined large sample sizes<sup>33,36</sup> (see Table 4).  
10 However, in each of the four meta-analysed studies different assay methods were used, and  
11 sampling methods varied significantly (see Table 2). The lowest quality study to be included  
12 in the meta-analysis did not report mental health co-morbidities and recruited participants  
13 from an inpatient setting<sup>34</sup>. There was also a wide range in age of participants included in the  
14 four studies, with the largest study examining CRP levels in adolescents, that would likely  
15 contribute to high heterogeneity.  
16  
17  
18  
19  
20  
21

22 Five studies<sup>33-36,38</sup> ( $n=4669$ ), one of which was conducted in 16 year olds<sup>33</sup> and two in  
23 participants with co-morbid heart disease<sup>38</sup>, reported significantly higher CRP levels in  
24 participants with a diagnosis of GAD. The largest study<sup>39</sup> ( $n=5810$ ) examining CRP in GAD  
25 examined CRP levels in children from baseline measurement aged 9-16 years to follow up  
26 aged 19-21. This was the only study to examine the longitudinal association between GAD  
27 and CRP, and found a bivariate association both cross-sectionally and over time between  
28 GAD and elevated CRP, however, this was accounted for by potential co-variables including  
29 BMI and medication use. The only study<sup>40</sup> to find an inverse correlation between CRP and  
30 GAD was conducted in non-smoking women from a study in Finland and did not specify the  
31 numbers of participants with a diagnosis of GAD or group differences.  
32  
33  
34  
35

36 No difference was found in a cohort study ( $n=821$ ) that used a combined inflammatory index  
37 consisting of CRP, IL-6 and TNF- $\alpha$  in 93 patients with a diagnosis of GAD and controls with  
38 a history of cardiovascular disease (CVD)<sup>41</sup>. Subgroup analysis examining differences in  
39 individual inflammatory markers was not reported<sup>41</sup>.  
40  
41  
42

43 We found two studies<sup>35,42</sup> ( $n= 196$ ) that examined the association of severity of GAD  
44 symptoms with CRP level. One found a significant positive correlation between CRP level  
45 and GAD-7 scores<sup>35</sup>, and the other reporting CRP differences in 70 GAD patients with and  
46 without a diagnosis of alexithymia found a significant association between higher CRP and  
47 suicidal ideation<sup>42</sup>.  
48  
49

50 Although the meta-analysis and the majority of included studies reported raised CRP in  
51 GAD, there was wide variation in reporting and adjustment for important potential  
52 moderators, including co-morbid MDD, use of medications, assay used and time of day of  
53 blood collection, all of which likely contributed to the high degree of heterogeneity between  
54 studies. Of the nine studies to analyse CRP, four (44.4%) did not exclude or adjust for  
55 medication use by participants<sup>33,38,40,41</sup>. Co-morbid MDD was not adjusted for in analysis by  
56 two studies<sup>39,41</sup>, one of which was included in the meta-analysis<sup>39</sup>. Only three of the nine  
57 studies reported time of sample collection<sup>35,36,42</sup> or whether this was in a fasted state<sup>36,41,42</sup>,  
58  
59  
60

1  
2  
3 and though all studies utilised a similar assay method, different assay types were used in  
4 every study.  
5  
6

7 In summary, of the nine studies to have examined differences between GAD and controls, the  
8 majority reported raised CRP in GAD and meta-analysis found significantly raised CRP in  
9 GAD with a small effect size. However, there was wide variation in study methods including  
10 variable adjustment for mediators of inflammation such as co-morbid MDD, medication use  
11 and sampling methods. Only one study examined CRP in GAD longitudinally, reporting a  
12 bivariate association accounted for by health seeking behaviours<sup>39</sup>.  
13  
14  
15  
16

### 17 Interleukins

18 Seven studies examined the association between interleukins and GAD (see Table 3). IL-6 is  
19 a mediator of T-cell and B-cell activation and induces acute phase proteins in hepatocytes,  
20 among other functions<sup>32</sup>. Pharmacological blockade of IL-6 action is used to treat several  
21 auto-immune conditions including RA, and raised IL-6 has been associated with a number of  
22 psychiatric conditions including depression, schizophrenia and PTSD<sup>32,43</sup>. We found IL-6  
23 was the most frequently measured interleukin, with five studies (n=2066) examining changes  
24 in GAD patients compared to controls<sup>35,36,41,44,45</sup>. The largest study investigated differences  
25 between 454 participants with a diagnosis of GAD and 556 controls from The Netherlands  
26 Study of Depression and Anxiety (NESDA) cohort<sup>36</sup>. Though analysis was conducted on  
27 anxiety disorders as a whole, mean difference in IL-6 in people with GAD compared to  
28 controls obtained through direct communication with the author showed significantly higher  
29 levels in GAD. However, it is unclear whether these differences remain significant after  
30 adjustment for group differences and no associations were found between IL-6 and  
31 participants who had all types of anxiety disorder<sup>36</sup>. Two studies<sup>35,45</sup> (n=165), one of which  
32 used saliva samples<sup>45</sup>, reported significantly higher IL-6 in medication naïve participants with  
33 a diagnosis of GAD compared to age and sex matched healthy controls.  
34  
35  
36  
37  
38  
39  
40

41 No difference was found in a combined inflammatory index consisting of CRP, IL-6 and  
42 TNF- $\alpha$  in a study of 93 patients with GAD and co-morbid ischaemic heart disease<sup>41</sup>. One  
43 case-controlled study<sup>35</sup> of 48 Chinese outpatients presenting for the first time with a diagnosis  
44 of GAD and 48 age, sex and education matched controls accounted for all results for IL-1 $\alpha$ ,  
45 5, 8, 12p70. This study found significantly higher levels of IL-1 $\alpha$ , -8 and -12p70 in GAD  
46 patients, in addition to higher levels of IL-1 $\alpha$  and IL-8 with increased severity of GAD (as  
47 measured by GAD-7 scale), but did not account for chronic physical co-morbidities during  
48 recruitment or in analysis. Both IL-1 $\alpha$  and IL-8 have pro-inflammatory functions as chemo-  
49 attractants for leukocytes and haematopoiesis, and have been targeted for treatments in a  
50 number of auto-immune conditions<sup>32</sup>. However, there was no association between GAD and  
51 IL-5, which is thought to predominantly mediate myeloid cell activation, and is a target of  
52 treatment in asthma<sup>32</sup>. The same study<sup>35</sup> also examined IL-2, which has a major role in T-cell  
53 mediated autoimmune and inflammatory conditions<sup>32</sup>. Results showed significantly higher  
54 IL-2 in GAD patients, however, this conflicted with results from a smaller study (n=24) that  
55 found no significant difference between medication naïve GAD patients and controls, though  
56  
57  
58  
59  
60

1  
2  
3 few details of the characteristics of participants, sampling or analysis were reported in this  
4 abstract<sup>46</sup>.  
5

6  
7 One study that measured IL-1 using sputum analysis found significantly higher levels in  
8 GAD compared to controls in 69 participants recruited from the same Chinese hospital<sup>45</sup>.  
9 Though IL-1 is pro-inflammatory, there are differences in function dependent on the class of  
10 IL-1 protein measured which was not reported in this study<sup>45</sup>.  
11  
12

13 IL-4 has several pro-inflammatory functions including immunoglobulin-E (Ig-E) class  
14 switching, expression of MHC class II and acts as a survival factor for T and B cells<sup>32</sup>. The  
15 only study to measure IL-4, found no differences between 54 GAD patients recruited from  
16 community mental health teams and primary care after controlling for age, sex, BMI,  
17 smoking, alcohol consumption and co-morbid depression<sup>47</sup>. This study<sup>47</sup> also investigated IL-  
18 10, which was the only cytokine with an anti-inflammatory function to be measured and is  
19 involved in immunosuppression of T cell subsets and B cell immunoglobulin production.  
20 This found significantly lower levels of IL-10 (OR 0.35  $p = 0.003$ ) in GAD patients.  
21 However, this opposed findings from a smaller study ( $n=24$ ) which reported significantly  
22 higher levels of IL-10 in GAD patients compared to controls, though it was not reported  
23 whether this association remained significant after controlling for group differences<sup>46</sup>.  
24  
25  
26  
27  
28  
29

30 In summary, IL-6 was the most commonly measured interleukin raised in GAD compared to  
31 controls in the majority of studies, however, no study examined the longitudinal association  
32 with GAD. Other interleukins were examined by relatively few studies that examined small  
33 numbers cross-sectionally with mixed findings.  
34  
35

### 36 **IFN- $\gamma$**

37 IFN- $\gamma$  has anti-viral roles including promoting cytotoxic activity, MHC class I and II  
38 upregulation, NK cell activation, and is a treatment target in inflammatory conditions such as  
39 Crohn's disease<sup>32</sup>. Three studies investigated IFN- $\gamma$  levels in GAD ( $n= 330$ )<sup>35,40,47</sup>. The  
40 largest study ( $n=118$ ) found higher IFN- $\gamma$  in GAD patients from the UK that remained  
41 significant after adjustment for age, gender, BMI, smoking, alcohol and co-morbid  
42 depression, but did not adjust for anxiolytic medication use in analysis<sup>47</sup>. This finding was  
43 supported by a study of 96 participants which reported higher IFN- $\gamma$  levels in GAD and a  
44 significant positive correlation between anxiety severity and IFN- $\gamma$ <sup>35</sup>. Conflicting findings  
45 were reported by a Finnish study of 116 participants, which found significantly lower IFN- $\gamma$   
46 in GAD patients. However, the number of participants with a diagnosis of GAD, differences  
47 between groups and adjustment for potential confounders were not reported<sup>40</sup>. In summary,  
48 only a few small cross-sectional studies have examined differences in IFN- $\gamma$  between GAD  
49 and control groups, and their findings were mixed.  
50  
51  
52  
53  
54

### 55 **TNF- $\alpha$**

56 TNF- $\alpha$  has a wide array of roles in host defence, including initiating a strong acute  
57 inflammatory response but limiting duration of inflammatory activation, and is the target of  
58 blocking monoclonal antibodies in the treatment of a wide array of autoimmune conditions  
59  
60

1  
2  
3 including Crohn's disease and RA<sup>32</sup>. Six studies (n=2300) investigated TNF- $\alpha$  in GAD, with  
4 mixed findings. Three studies (n=303) found TNF- $\alpha$  significantly raised in GAD patients  
5 compared to controls<sup>40,45,47</sup>. However, the largest study to measure TNF- $\alpha$  (n=1010) found no  
6 difference between participants with GAD and controls, and no correlation between TNF- $\alpha$   
7 and anxiety symptoms<sup>36</sup>. This finding was supported by a study of 93 patients with GAD and  
8 co-morbid ischaemic heart disease using a combined inflammatory index of CRP, IL-6 and  
9 TNF- $\alpha$  which reported no difference compared to controls<sup>41</sup>. In summary, though the  
10 majority of studies to measure differences in TNF- $\alpha$  between GAD and controls reported  
11 significantly raised levels, these comprised small cross-sectional studies and the largest study  
12 reported no difference.  
13  
14  
15  
16

### 17 **Other cytokines**

18 One study compared levels of the pro-inflammatory cytokines CCL-5, MCP-1 and SDF-1 in  
19 120 medication naïve physically well patients with a diagnosis of GAD and co-morbid  
20 personality disorder to 40 controls<sup>48</sup>. Significantly higher levels of MCP-1 and SDF-1 were  
21 reported in both men and women, and higher CCL-5 in men but not women with a diagnosis  
22 of GAD compared to controls<sup>48</sup>.  
23  
24  
25  
26

### 27 **Discussion**

28 To our knowledge, this is the first systematic review and meta-analysis focusing on  
29 inflammatory cytokines in GAD. Using a range of databases we identified 14 studies,  
30 comprising 1188 participants with GAD and which measured 16 cytokines. We found  
31 significantly raised levels of CRP, IFN- $\gamma$  and TNF- $\alpha$  in people with GAD compared to  
32 controls which were findings replicated in two or more studies. A further 10 pro-  
33 inflammatory cytokines were reported to be significantly raised in GAD in at least one study,  
34 however, 6/14 studies found no difference in at least one cytokine.  
35  
36  
37  
38  
39  
40

41 Despite substantial efforts to acquire data by contacting authors, it was only possible to  
42 conduct a meta-analysis of CRP. This identified significantly higher levels in GAD compared  
43 to controls with a small effect size (SMD: 0.38), though there was evidence of significant  
44 heterogeneity across studies ( $I^2 = 75\%$ ). This effect size in CRP is greater than has been  
45 reported in other anxiety disorders (PTSD: SMD = -0.14)<sup>24</sup> or MDD (SMD= 0.14)<sup>6</sup>, and is  
46 similar to that reported in schizophrenia (SMD= 0.45)<sup>49</sup>. However, the effect size of our  
47 meta-analysis was driven by findings in poorer quality studies with small sample sizes. The  
48 two higher quality, larger studies reported a smaller effect size and no significant difference  
49 between groups respectively. As a result, further high quality studies are required to confirm  
50 our findings of raised CRP in GAD.  
51  
52  
53

54 Though we were only able to meta-analyse CRP, meta-analyses of different cytokines in  
55 other anxiety disorders have been conducted with larger effect sizes. A meta-analysis of  
56 inflammatory markers in PTSD identified 20 studies which reported increased interleukin 6  
57 (IL-6), interleukin 1 $\beta$  (IL-1 $\beta$ ), tumour necrosis factor- $\alpha$  (TNF $\alpha$ ), and interferon  $\gamma$  (IFN  $\gamma$ )  
58 levels with effect sizes ranging from small (IFN  $\gamma$ : SMD 0.49) to large 1.42 (IL-1 $\beta$ : SMD  
59  
60

1  
2  
3 1.42)<sup>24</sup>. However, a systematic review and meta-analysis of pro-inflammatory cytokines in  
4 OCD identified 12 studies, and concluded that there was a significant reduction in IL-1 $\beta$  with  
5 moderate effect size (SMD: -0.60,  $p < 0.001$ ), and only IL-6 levels were significantly  
6 increased after subgroup analysis in medication-free adults with OCD<sup>7</sup>. It is unclear whether  
7 this profile of inflammatory marker changes would follow a similar pattern in GAD if future  
8 studies enabled further meta-analysis.  
9  
10

11  
12 In light of the high heterogeneity among studies, low participant numbers and inconsistent  
13 reporting and adjustment for known confounding factors such as BMI, smoking, medication  
14 use and co-morbidities our findings should be interpreted with caution. It was not possible to  
15 analyse the cause of the degree of heterogeneity due to the paucity of studies. Other known  
16 mediators of inflammation<sup>24</sup> such as physical activity, raised blood pressure and genetics  
17 were not accounted for. Furthermore, reporting of GAD severity and duration of symptoms  
18 was generally poor, preventing detailed analysis of whether inflammatory markers predicted  
19 outcomes and quality of life. We also found limitations in inclusion of specific demographics  
20 of participants with GAD. For example, despite GAD in older adults being prevalent and  
21 often treatment resistant<sup>50,51,52</sup>, only two studies included participants over the age of 65, both  
22 of which only included patients with co-morbid ischaemic heart disease.  
23  
24  
25  
26  
27

28 We are beginning to understand the interplay between cytokines, the immune system and  
29 mental health<sup>1,53</sup>. At a molecular level we are aware that pro-inflammatory cytokines,  
30 including IFN, IL-1 $\beta$  and TNF, can reduce the availability of monoamines by inducing  
31 expression of pre-synaptic reuptake pumps and inhibiting enzymes involved in monoamine  
32 synthesis<sup>54</sup>, linking the monoamine theory of anxiety with inflammatory mechanisms. There  
33 is also a growing understanding of the relationship between systemic inflammation and the  
34 central nervous system (CNS)<sup>1,55</sup>. Microglial activation has been shown to be mediated by  
35 peripheral cytokines, and increased activation has been found in post-mortem studies of  
36 patients with MDD and schizophrenia<sup>1</sup>. No study we identified correlated inflammatory  
37 marker changes with in vivo microglial activation imaging in GAD and to our knowledge no  
38 research on post-mortem microglial changes in GAD has been conducted. Increased neuronal  
39 activity has also been shown to induce inflammatory and vascular changes in the brain,  
40 suggesting that psychological stress can not only be induced by inflammation but perpetuate  
41 chronic low grade inflammation seen in other vascular and neurodegenerative disorders<sup>55</sup>.  
42 Understanding interactions between the CNS and immune system, and identifying  
43 biomarkers of GAD offers potential for novel therapeutic approaches. The revolution of  
44 development of monoclonal-antibody therapies for inflammatory disorders<sup>56</sup> raises the  
45 possibility of repurposing these medications for trials in treatment resistant GAD if specific  
46 and consistent profiles of inflammatory biomarkers are identified.  
47  
48  
49  
50  
51  
52  
53

54  
55 However, it remains unclear as to whether inflammation plays a causal role in GAD<sup>43,54</sup>. For  
56 example, although IL-6 is a successful target for treatment in a number of auto-immune  
57 conditions and raised IL-6 is implicated in several psychiatric disorders, it also acts to reduce  
58 other pro-inflammatory cytokines such as TNF via negative feedback and is induced by  
59 physical exercise, hyperthermia, fasting, sleep deprivation and sunlight exposure without  
60

1  
2  
3 activation other pro-inflammatory cytokines<sup>43</sup>. This raises the question as to whether  
4 inflammation in GAD is a consequence rather than cause of symptoms. This will only be  
5 answered by large prospective longitudinal studies, better characterising the relationship  
6 between inflammation and GAD. However, remarkably our review identified only one  
7 longitudinal study of inflammation in GAD patients that examined a cohort of adolescents  
8 until the age of 21 and only investigated CRP.  
9  
10

11  
12 Recent studies using Mendelian randomisation in depression have suggested that cytokines  
13 such as IL-6 are causal risk factors for depression<sup>57</sup>, and trials of immunotherapy in psychosis  
14 are already underway<sup>58</sup>. Our study suggests that GAD is an important candidate for future  
15 similar future studies exploring causality of inflammation and potentially novel drug trials.  
16  
17  
18

## 19 20 **Conclusion**

21 There is some preliminary evidence to suggest a raised inflammatory response in GAD,  
22 although it is unclear whether inflammatory cytokines play a role in aetiology. GAD remains  
23 a poorly studied area of psychiatric neuroinflammatory research compared to other mental  
24 illnesses such as MDD and schizophrenia. While we are a long way from using inflammatory  
25 cytokines as a biomarker or treatment target in GAD, current findings reflect inflammatory  
26 changes seen in other mental illnesses and highlight the importance of ongoing investigation  
27 of the role inflammation plays in the development and course of GAD. Further,  
28 methodologically consistent, prospective, longitudinal studies examining the mechanisms and  
29 relationship between inflammation and GAD, while accounting for known mediators of  
30 cytokine production, are required.  
31  
32  
33  
34  
35

## 36 **Acknowledgements/ Funding Sources**

37 HC and EA are NIHR Academic Clinical Fellows (ACF). This research was supported by the  
38 NIHR Biomedical Research Centre at University College London/University College  
39 Hospital London.  
40

## 41 **Declaration of interests**

42 All authors declare no competing interests.  
43  
44

## 45 **Contributors**

46 RH, RG and HC were involved in initial design of the research. EA and HC performed data  
47 extraction of included studies and quality analysis. HC wrote the initial draft of the  
48 manuscript and did the statistical analysis with supervision from RG and RH. RH, RG and  
49 HC participated in the critical revision of the Article and all authors approved the final  
50 Article.  
51  
52  
53

## 54 **Data sharing**

55 All data is available on request from the corresponding author.  
56  
57  
58  
59  
60

1  
2  
3 **Figure legends:**  
4

5 Figure 1. Flow of studies in the systematic review and meta-analysis.  
6

7 Figure 2. Random effects meta-analysis of CRP levels in GAD vs controls.  
8  
9  
10  
11  
12  
13  
14  
15  
16  
17  
18  
19  
20  
21  
22  
23  
24  
25  
26  
27  
28  
29  
30  
31  
32  
33  
34  
35  
36  
37  
38  
39  
40  
41  
42  
43  
44  
45  
46  
47  
48  
49  
50  
51  
52  
53  
54  
55  
56  
57  
58  
59  
60

For peer review only



Table 1. Study &amp; clinical characteristics

| Study                          | Country | Study type          | Inflammatory markers                       | N   |            | Standardised diagnostic assessment/criteria                                                               | Anxiety measure                               | Age (years, SD)                                                       |              | % Female                                                 |         | BMI                                                             |              | Current smoking                                       | Medicated                                                | Physical health co-morbidities                       | Mental health co-morbidities                                                                                                                                   |
|--------------------------------|---------|---------------------|--------------------------------------------|-----|------------|-----------------------------------------------------------------------------------------------------------|-----------------------------------------------|-----------------------------------------------------------------------|--------------|----------------------------------------------------------|---------|-----------------------------------------------------------------|--------------|-------------------------------------------------------|----------------------------------------------------------|------------------------------------------------------|----------------------------------------------------------------------------------------------------------------------------------------------------------------|
|                                |         |                     |                                            | GAD | Control    |                                                                                                           |                                               | GAD                                                                   | Control      | GAD                                                      | Control | GAD                                                             | Control      |                                                       |                                                          |                                                      |                                                                                                                                                                |
| <b>Bankier et al. 2008</b>     | US      | Case-control        | CRP                                        | 15  | 30         | SCID, DSM IV                                                                                              | nr                                            | nr                                                                    | 67.6 (12.7)  | nr                                                       | 33%     | nr                                                              | nr           | GAD: nr.<br>Controls: 10%                             | nr                                                       | All participants had CVD. Excluded other conditions. | Excluded.                                                                                                                                                      |
| <b>Copeland et al. 2012</b>    | US      | Cohort, prospective | CRP                                        | 146 | 5664       | Child and adolescent psychiatric assessment <16, Young adult psychiatric assessment >16. DSM IV criteria. | Total number of anxiety symptoms (range: 0-6) | 14.21 All subjects (Odds or means ratio 1.12 (1.03-1.22) with GAD dx) |              | 48.7% (Odds or means ratio 2.02 (1.04-3.92) with GAD dx) |         | 22.37 (5.62) (Odds or means ratio 1.08 (1.05-1.11) with GAD dx) |              | Total sample: 13.5% (Odds/means ratio with GAD: 2.86) | 30.2% 'use medication' (Odds/means ratio with GAD: 2.00) | 34.7% had 'recent health ailments'.                  | Total sample: 39.9% co-morbid MDD.                                                                                                                             |
| <b>De Berardis et al. 2017</b> | Canada  | Cross-sectional     | CRP                                        | 70  | no control | SCID, DSM IV                                                                                              | HAM-A (score >20 for inclusion)               | 28.2 (5.3)                                                            | -            | 51.40%                                                   | -       | 22.1 (1.67)                                                     | -            | nr                                                    | Excluded                                                 | Excluded                                             | Total sample: 44.3% of participants had alexithymia. Excluded other co-morbid mental illness GAD: 14.3% co-morbid MDD. Excluded other co-morbid mental illness |
| <b>Hoge et al. 2016</b>        | US      | RCT                 | TNF- $\alpha$ , IL-6                       | 70  | no control | SCID, DSM IV                                                                                              | nr                                            | 39.12                                                                 | -            | 45.70%                                                   | -       | nr                                                              | -            | nr                                                    | Excluded                                                 | Excluded                                             | Excluded other co-morbid mental illness                                                                                                                        |
| <b>Hou et al. 2017</b>         | UK      | Case-control        | IL-4, IL-10, TNF- $\alpha$ , IFN- $\gamma$ | 54  | 64         | MINI, DSM-IV & ICD-10 criteria                                                                            | HADS, GAD-7 (score >10 for inclusion)         | 35.06 (14.45)                                                         | 25.75 (8.87) | 34%                                                      | 50%     | 24.84 (5.70)                                                    | 22.45 (3.27) | GAD: 22%<br>Controls: 34%                             | GAD: 67% use 'anxiolytic' medication.<br>Excluded        | Excluded.                                            | Excluded                                                                                                                                                       |

|    |                              |         |                     |                                                                               |     |      |                        |                 |               |               |        |        |                |              |                          |                                                               |                                                    |          | other medication use.                                                                         |
|----|------------------------------|---------|---------------------|-------------------------------------------------------------------------------|-----|------|------------------------|-----------------|---------------|---------------|--------|--------|----------------|--------------|--------------------------|---------------------------------------------------------------|----------------------------------------------------|----------|-----------------------------------------------------------------------------------------------|
| 1  |                              |         |                     |                                                                               |     |      |                        |                 |               |               |        |        |                |              |                          |                                                               |                                                    |          |                                                                                               |
| 2  |                              |         |                     |                                                                               |     |      |                        |                 |               |               |        |        |                |              |                          |                                                               |                                                    |          |                                                                                               |
| 3  |                              |         |                     |                                                                               |     |      |                        |                 |               |               |        |        |                |              |                          |                                                               |                                                    |          |                                                                                               |
| 4  |                              |         |                     |                                                                               |     |      |                        |                 |               |               |        |        |                |              |                          |                                                               |                                                    |          |                                                                                               |
| 5  |                              |         |                     |                                                                               |     |      |                        |                 |               |               |        |        |                |              |                          |                                                               |                                                    |          |                                                                                               |
| 6  |                              |         |                     |                                                                               |     |      |                        |                 |               |               |        |        |                |              |                          |                                                               |                                                    |          | GAD:                                                                                          |
| 7  |                              |         |                     |                                                                               |     |      |                        |                 |               |               |        |        |                |              |                          |                                                               |                                                    |          | 30.77%                                                                                        |
| 8  | <b>Khandaker et al. 2016</b> | UK      | Cohort, prospective | CRP                                                                           | 26  | 3392 | DAWBA, DSM-IV criteria | DAWBA           | 15.56 (0.24)  | 15.53 (0.31)  | 90%    | 52.30% | 22.55 (3.52)   | 21.40 (3.63) | nr                       | nr                                                            | nr                                                 |          | co-morbid MDD. Excluded other co-morbid mental illness.                                       |
| 9  |                              |         |                     |                                                                               |     |      |                        |                 |               |               |        |        |                |              |                          |                                                               |                                                    |          |                                                                                               |
| 10 |                              |         |                     |                                                                               |     |      |                        |                 |               |               |        |        |                |              |                          |                                                               |                                                    |          |                                                                                               |
| 11 |                              |         |                     |                                                                               |     |      |                        |                 |               |               |        |        |                |              |                          |                                                               |                                                    |          |                                                                                               |
| 12 |                              |         |                     |                                                                               |     |      |                        |                 |               |               |        |        |                |              |                          |                                                               |                                                    |          |                                                                                               |
| 13 | <b>Korkelia et al. 2010</b>  | Finland | Cross-sectional     | CRP, TNF- $\alpha$ , IFN- $\gamma$                                            | 116 |      | MINI                   | nr              | nr            | nr            | 100%   | 100%   | All 25.3 (5.0) | nr           | Excluded                 | nr                                                            | nr                                                 | nr       |                                                                                               |
| 14 |                              |         |                     |                                                                               |     |      |                        |                 |               |               |        |        |                |              |                          |                                                               |                                                    |          |                                                                                               |
| 15 |                              |         |                     |                                                                               |     |      |                        |                 |               |               |        |        |                |              |                          |                                                               |                                                    |          |                                                                                               |
| 16 |                              |         |                     |                                                                               |     |      |                        |                 |               |               |        |        |                |              |                          |                                                               |                                                    |          |                                                                                               |
| 17 |                              |         |                     |                                                                               |     |      |                        |                 |               |               |        |        |                |              |                          |                                                               |                                                    |          |                                                                                               |
| 18 | <b>Nayek et al 2016</b>      | India   | Case-control        | CRP                                                                           | 50  | 50   | ICD-10                 | nr              | 37.96 (10.7)  | 37.00 (12.08) | 54%    | 23%    | nr             | nr           | Excluded                 | Excluded if using HRT or OCP. Other medications not reported. | Excluded                                           | nr       |                                                                                               |
| 19 |                              |         |                     |                                                                               |     |      |                        |                 |               |               |        |        |                |              |                          |                                                               |                                                    |          |                                                                                               |
| 20 |                              |         |                     |                                                                               |     |      |                        |                 |               |               |        |        |                |              |                          |                                                               |                                                    |          |                                                                                               |
| 21 |                              |         |                     |                                                                               |     |      |                        |                 |               |               |        |        |                |              |                          |                                                               |                                                    |          |                                                                                               |
| 22 |                              |         |                     |                                                                               |     |      |                        |                 |               |               |        |        |                |              |                          |                                                               |                                                    |          |                                                                                               |
| 23 |                              |         |                     |                                                                               |     |      |                        |                 |               |               |        |        |                |              |                          |                                                               |                                                    |          |                                                                                               |
| 24 |                              |         |                     |                                                                               |     |      |                        |                 |               |               |        |        |                |              |                          |                                                               |                                                    |          | All participants had co-morbid personality disorder. Excluded other co-morbid mental illness. |
| 25 |                              |         |                     |                                                                               |     |      |                        |                 |               |               |        |        |                |              |                          |                                                               |                                                    |          |                                                                                               |
| 26 | <b>Oglodek et al. 2015</b>   | Poland  | Case-control        | SDF-1, CCL-5, MCP-1                                                           | 120 | 40   | DSM-V                  | nr              | 41.4 (3.5)    | 40.8 (3.1)    | 50%    | nr     | nr             | nr           | nr                       | Excluded                                                      | Excluded                                           |          |                                                                                               |
| 27 |                              |         |                     |                                                                               |     |      |                        |                 |               |               |        |        |                |              |                          |                                                               |                                                    |          |                                                                                               |
| 28 |                              |         |                     |                                                                               |     |      |                        |                 |               |               |        |        |                |              |                          |                                                               |                                                    |          |                                                                                               |
| 29 |                              |         |                     |                                                                               |     |      |                        |                 |               |               |        |        |                |              |                          |                                                               |                                                    |          |                                                                                               |
| 30 |                              |         |                     |                                                                               |     |      |                        |                 |               |               |        |        |                |              |                          |                                                               |                                                    |          |                                                                                               |
| 31 |                              |         |                     |                                                                               |     |      |                        |                 |               |               |        |        |                |              |                          |                                                               |                                                    |          |                                                                                               |
| 32 |                              |         |                     |                                                                               |     |      |                        |                 |               |               |        |        |                |              |                          |                                                               |                                                    |          |                                                                                               |
| 33 |                              |         |                     |                                                                               |     |      |                        |                 |               |               |        |        |                |              |                          |                                                               |                                                    |          |                                                                                               |
| 34 | <b>Tang et al. 2017</b>      | China   | Case-control        | CRP, IL-1 $\alpha$ , IL-2, IL-5, IL-6, IL-8, IL-12p70, IFN- $\gamma$ , GM-CSF | 48  | 48   | MINI, DSM-IV           | GAD-7, SAI, TAI | 40.75 (12.21) | 39.56 (10.06) | 58.33% | 64.17% | 22.56 (2.73)   | 22.69 (2.63) | GAD: 29% . Controls: 23% | Excluded                                                      | Excluded acute illness. Chronic co-morbidities nr. | Excluded |                                                                                               |
| 35 |                              |         |                     |                                                                               |     |      |                        |                 |               |               |        |        |                |              |                          |                                                               |                                                    |          |                                                                                               |
| 36 |                              |         |                     |                                                                               |     |      |                        |                 |               |               |        |        |                |              |                          |                                                               |                                                    |          |                                                                                               |
| 37 |                              |         |                     |                                                                               |     |      |                        |                 |               |               |        |        |                |              |                          |                                                               |                                                    |          |                                                                                               |
| 38 |                              |         |                     |                                                                               |     |      |                        |                 |               |               |        |        |                |              |                          |                                                               |                                                    |          |                                                                                               |
| 39 | <b>Tofani et al. 2015</b>    | Italy   | Case-control        | IL-2, IL-10                                                                   | 14  | 10   | MINI, DSM-IV           | GAD-7           | nr            | nr            | nr     | nr     | nr             | nr           | nr                       | Excluded                                                      | nr                                                 | Excluded |                                                                                               |
| 40 |                              |         |                     |                                                                               |     |      |                        |                 |               |               |        |        |                |              |                          |                                                               |                                                    |          |                                                                                               |
| 41 |                              |         |                     |                                                                               |     |      |                        |                 |               |               |        |        |                |              |                          |                                                               |                                                    |          |                                                                                               |
| 42 |                              |         |                     |                                                                               |     |      |                        |                 |               |               |        |        |                |              |                          |                                                               |                                                    |          |                                                                                               |
| 43 |                              |         |                     |                                                                               |     |      |                        |                 |               |               |        |        |                |              |                          |                                                               |                                                    |          |                                                                                               |
| 44 |                              |         |                     |                                                                               |     |      |                        |                 |               |               |        |        |                |              |                          |                                                               |                                                    |          |                                                                                               |
| 45 |                              |         |                     |                                                                               |     |      |                        |                 |               |               |        |        |                |              |                          |                                                               |                                                    |          |                                                                                               |
| 46 |                              |         |                     |                                                                               |     |      |                        |                 |               |               |        |        |                |              |                          |                                                               |                                                    |          |                                                                                               |

|    |                             |         |                     |                           |     |     |                    |       |                           |            |            |                     |            |            |                            |          |                                                                                                                                                 |                                                                           |
|----|-----------------------------|---------|---------------------|---------------------------|-----|-----|--------------------|-------|---------------------------|------------|------------|---------------------|------------|------------|----------------------------|----------|-------------------------------------------------------------------------------------------------------------------------------------------------|---------------------------------------------------------------------------|
| 1  |                             |         |                     |                           |     |     |                    |       |                           |            |            |                     |            |            |                            |          | Total sample: 6.2% CVD, 4.9% diabetes, mean of 0.4 other chronic diseases. Additional group with comorbid asthma. Excluded other comorbidities. | Total sample: 58.4% comorbid MDD. Excluded other comorbid mental illness. |
| 2  |                             |         |                     |                           |     |     |                    |       |                           |            |            |                     |            |            |                            |          |                                                                                                                                                 |                                                                           |
| 3  | <b>Vogelzans et al 2013</b> | Holland | Cohort              | CRP, IL-6, TNF- $\alpha$  | 454 | 556 | CIDI, DSM criteria | BAI   | Total sample: 41.8 (13.1) | 66.90%     | 25.6 (5.1) | Total sample: 38.2% | nr         |            |                            |          |                                                                                                                                                 |                                                                           |
| 4  |                             |         |                     |                           |     |     |                    |       |                           |            |            |                     |            |            |                            |          |                                                                                                                                                 |                                                                           |
| 5  |                             |         |                     |                           |     |     |                    |       |                           |            |            |                     |            |            |                            |          |                                                                                                                                                 |                                                                           |
| 6  |                             |         |                     |                           |     |     |                    |       |                           |            |            |                     |            |            |                            |          |                                                                                                                                                 |                                                                           |
| 7  |                             |         |                     |                           |     |     |                    |       |                           |            |            |                     |            |            |                            |          |                                                                                                                                                 |                                                                           |
| 8  |                             |         |                     |                           |     |     |                    |       |                           |            |            |                     |            |            |                            |          |                                                                                                                                                 |                                                                           |
| 9  |                             |         |                     |                           |     |     |                    |       |                           |            |            |                     |            |            |                            |          |                                                                                                                                                 |                                                                           |
| 10 |                             |         |                     |                           |     |     |                    |       |                           |            |            |                     |            |            |                            |          |                                                                                                                                                 |                                                                           |
| 11 |                             |         |                     |                           |     |     |                    |       |                           |            |            |                     |            |            |                            |          |                                                                                                                                                 |                                                                           |
| 12 | <b>Yang et al. 2017</b>     | China   | Case-control        | IL-1, IL-4, TNF- $\alpha$ | 28  | 41  | MINI, DSM IV       | HAM-A | 55.1 (6.9)                | 55.9 (5.6) | 53.60 %    | 48.80 %             | 22.0 (4.4) | 22.5 (3.7) | GAD: 35.7%. Control: 24.4% | Excluded |                                                                                                                                                 | Excluded                                                                  |
| 13 |                             |         |                     |                           |     |     |                    |       |                           |            |            |                     |            |            |                            |          |                                                                                                                                                 |                                                                           |
| 14 |                             |         |                     |                           |     |     |                    |       |                           |            |            |                     |            |            |                            |          |                                                                                                                                                 |                                                                           |
| 15 |                             |         |                     |                           |     |     |                    |       |                           |            |            |                     |            |            |                            |          |                                                                                                                                                 |                                                                           |
| 16 |                             |         |                     |                           |     |     |                    |       |                           |            |            |                     |            |            |                            |          |                                                                                                                                                 |                                                                           |
| 17 |                             |         |                     |                           |     |     |                    |       |                           |            |            |                     |            |            |                            |          |                                                                                                                                                 |                                                                           |
| 18 |                             |         |                     |                           |     |     |                    |       |                           |            |            |                     |            |            |                            |          |                                                                                                                                                 |                                                                           |
| 19 |                             |         |                     |                           |     |     |                    |       |                           |            |            |                     |            |            |                            |          |                                                                                                                                                 |                                                                           |
| 20 | <b>Zahm 2016</b>            | US      | Cohort, prospective | CRP, IL-6, TNF- $\alpha$  | 93  | 728 | CDIS, DSM IV       | nr    | 68 (9.6)                  | 17%        | nr         | nr                  | nr         | nr         |                            |          | All patients had history of CVD.                                                                                                                | GAD: 60.0% comorbid MDD, 86.2% had lifetime history MDD.                  |
| 21 |                             |         |                     |                           |     |     |                    |       |                           |            |            |                     |            |            |                            |          |                                                                                                                                                 |                                                                           |
| 22 |                             |         |                     |                           |     |     |                    |       |                           |            |            |                     |            |            |                            |          |                                                                                                                                                 |                                                                           |
| 23 |                             |         |                     |                           |     |     |                    |       |                           |            |            |                     |            |            |                            |          |                                                                                                                                                 |                                                                           |
| 24 |                             |         |                     |                           |     |     |                    |       |                           |            |            |                     |            |            |                            |          |                                                                                                                                                 |                                                                           |

not reported (nr), not applicable (-), sd: standard deviation, C-reactive protein (CRP), interleukin (IL-), tumour necrosis factor- $\alpha$  (TNF- $\alpha$ ), interferon- $\gamma$  (IFN- $\gamma$ ), stromal derived factor-1 (SDF-1), monocyte chemoattractant protein-1 (MCP-1), chemokine C-C motif ligand 5 (CCL-5), granulocyte-macrophage colony-stimulating factor (GM-CSF), Diagnostic and Statistical Manual of Mental Disorders (DSM), International classification of diseases (ICD), Computerised diagnostic interview schedule (CDIS), Composite Interview Diagnostic Instrument (CIDI), Mini-International Neuropsychiatric Interview (MINI), Structure clinical interview for DSM IV (SCID), Development and wellbeing assessment (DAWBA), Montgomery and Asberg Depression Rating Scale (MADRS), Hamilton Anxiety Rating Scale (HAM-A), Hospital Anxiety and Depression Scale (HADS), Generalised Anxiety Disorder Assessment (GAD-7), State-Anxiety Inventory (SAI), Test Anxiety Inventory (TAI), Beck Anxiety Inventory (BAI), Cardiovascular disease (CVD), Major depressive disorder (MDD), Socio-economic status (SES), Body mass index (BMI), Oral contraceptive pill (OCP), Hormone replacement therapy (HRT)

Table 2. Inflammatory marker sampling and analysis

| Study                   | GAD | Control    | Inflammatory markers                       | Nature of sample  | Cross-sectional or longitudinal                                | Time of day of sample | Fasted period before sample | Assay method                                          | Assay sensitivity reported | Inflammatory marker cutoff used. | Confounding factors controlled for                                                                                                  |
|-------------------------|-----|------------|--------------------------------------------|-------------------|----------------------------------------------------------------|-----------------------|-----------------------------|-------------------------------------------------------|----------------------------|----------------------------------|-------------------------------------------------------------------------------------------------------------------------------------|
| Bankier et al. 2008     | 15  | 30         | CRP                                        | Blood             | Cross-sectional                                                | nr                    | nr                          | High sensitivity tubidometric immunoassay             | Yes                        | CRP >3mg/l for significance      | Age, sex, education, MDD, obesity, smoking history, type II diabetes mellitus, hypertension, hyperlipidaemia, other mental illness. |
| Copeland et al. 2012    | 146 | 5664       | CRP                                        | Whole blood spots | Longitudinal: Sampled aged 9-16, 19, and 21 years old.         | nr                    | nr                          | Biotin-Streptavidin based Immunofluorometric system.  | Yes                        | Excluded if >10 mg/l             | Age, sex, race, SES, BMI, medication use, substance use, recent physical illness, chronic illness.                                  |
| De Berardis et al. 2017 | 70  | no control | CRP                                        | Serum             | Cross-sectional                                                | 7-8.30am              | 10 hour fast                | Highly sensitive nephelometric assay                  | Yes.                       | No                               | Age, sex, BMI, MDD, physical illness, other mental illness, medication use                                                          |
| Hoge et al. 2016        | 70  | no control | TNF- $\alpha$ , IL-6                       | Plasma            | Longitudinal: sampled pre- and post-psychological intervention | 1-4.30pm              | nr                          | nr                                                    | No                         | No                               | Age, sex, ethnicity, MDD, medication use, physical illness, other mental illness                                                    |
| Hou et al. 2017         | 54  | 64         | IL-4, IL-10, TNF- $\alpha$ , IFN- $\gamma$ | Serum             | Cross-sectional                                                | 9-10am                | nr                          | Multiplex ultra-sensitive immunoassay                 | Yes                        | No                               | Age, sex, BMI, smoking, alcohol consumption, MDD, physical illness, other mental illness                                            |
| Khandaker et al. 2016   | 26  | 3392       | CRP                                        | Serum             | Cross-sectional                                                | nr                    | 'Overnight'                 | Automated particle-enhanced immunoturbidimetric assay | No                         | Excluded if >10 mg/l             | Age, sex, parental SES, ethnicity, maternal age at delivery, concurrent infection, family history of inflammatory disease, MDD.     |
| Korkelia et al. 2010    |     | 116        | CRP, TNF- $\alpha$ , IFN- $\gamma$         | Blood             | Cross-sectional                                                | nr                    | nr                          | nr                                                    | No                         | No                               | BMI                                                                                                                                 |

|    |                              |     |     |                                                                               |        |                 |                            |                      |                                                       |     |                          |                                                                                                                                          |
|----|------------------------------|-----|-----|-------------------------------------------------------------------------------|--------|-----------------|----------------------------|----------------------|-------------------------------------------------------|-----|--------------------------|------------------------------------------------------------------------------------------------------------------------------------------|
| 1  | <b>Nayek et al 2016</b>      | 50  | 50  | CRP                                                                           | Serum  | Cross-sectional | nr                         | nr                   | Particle enhanced turbidimetric immunoassay technique | No  | Excluded if 'raised ESR' | Age, sex, SES, religion, marital status, locality, BMI >30, physical illness                                                             |
| 2  |                              |     |     |                                                                               |        |                 |                            |                      |                                                       |     |                          |                                                                                                                                          |
| 3  |                              |     |     |                                                                               |        |                 |                            |                      |                                                       |     |                          |                                                                                                                                          |
| 4  |                              |     |     |                                                                               |        |                 |                            |                      |                                                       |     |                          |                                                                                                                                          |
| 5  | <b>Oglodek et al. 2015</b>   | 120 | 40  | SDF-1, CCL-5, MCP-1                                                           | Plasma | Cross-sectional | 7-9am                      | Fasted, duration nr. | ELISA                                                 | Yes | No                       | Sex, other mental illness, physical illness, substance misuse, smoking status, medication use.                                           |
| 6  |                              |     |     |                                                                               |        |                 |                            |                      |                                                       |     |                          |                                                                                                                                          |
| 7  |                              |     |     |                                                                               |        |                 |                            |                      |                                                       |     |                          |                                                                                                                                          |
| 8  |                              |     |     |                                                                               |        |                 |                            |                      |                                                       |     |                          |                                                                                                                                          |
| 9  |                              |     |     |                                                                               |        |                 |                            |                      |                                                       |     |                          |                                                                                                                                          |
| 10 |                              |     |     |                                                                               |        |                 |                            |                      |                                                       |     |                          |                                                                                                                                          |
| 11 | <b>Tang et al. 2017</b>      | 48  | 48  | CRP, IL-1 $\alpha$ , IL-2, IL-5, IL-6, IL-8, IL-12p70, IFN- $\gamma$ , GM-CSF | Serum  | Cross-sectional | 9-10am                     | nr                   | ELISA                                                 | No  | No                       | Age, sex, education, BMI, smoking status, alcohol consumption, acute physical illness, other mental illness, medication use.             |
| 12 |                              |     |     |                                                                               |        |                 |                            |                      |                                                       |     |                          |                                                                                                                                          |
| 13 |                              |     |     |                                                                               |        |                 |                            |                      |                                                       |     |                          |                                                                                                                                          |
| 14 |                              |     |     |                                                                               |        |                 |                            |                      |                                                       |     |                          |                                                                                                                                          |
| 15 | <b>Tofani et al. 2015</b>    | 14  | 10  | IL-2, IL-10                                                                   | Plasma | Cross-sectional | nr                         | nr                   | Immunoenzymatic assay                                 | No  | No                       | Medication use.                                                                                                                          |
| 16 |                              |     |     |                                                                               |        |                 |                            |                      |                                                       |     |                          |                                                                                                                                          |
| 17 |                              |     |     |                                                                               |        |                 |                            |                      |                                                       |     |                          |                                                                                                                                          |
| 18 |                              |     |     |                                                                               |        |                 |                            |                      |                                                       |     |                          |                                                                                                                                          |
| 19 |                              |     |     |                                                                               |        |                 |                            |                      |                                                       |     |                          |                                                                                                                                          |
| 20 | <b>Vogelzangs et al 2013</b> | 454 | 556 | CRP, IL-6, TNF- $\alpha$                                                      | Plasma | Cross-sectional | 8-9am                      | 'Overnight'          | ELISA                                                 | Yes | No                       | Age, sex, education, smoking status, alcohol intake, physical activity, BMI, physical illness, medication use, MDD, other mental illness |
| 21 |                              |     |     |                                                                               |        |                 |                            |                      |                                                       |     |                          |                                                                                                                                          |
| 22 |                              |     |     |                                                                               |        |                 |                            |                      |                                                       |     |                          |                                                                                                                                          |
| 23 |                              |     |     |                                                                               |        |                 |                            |                      |                                                       |     |                          |                                                                                                                                          |
| 24 |                              |     |     |                                                                               |        |                 |                            |                      |                                                       |     |                          |                                                                                                                                          |
| 25 |                              |     |     |                                                                               |        |                 |                            |                      |                                                       |     |                          |                                                                                                                                          |
| 26 | <b>Yang et al. 2017</b>      | 28  | 41  | IL-1, IL-4, IL-6, TNF- $\alpha$                                               | Saliva | Cross-sectional | nr                         | 'Overnight'          | ELISA                                                 | Yes | No                       | Age, sex, smoking status, BMI, medication use, physical illness, other mental illness                                                    |
| 27 |                              |     |     |                                                                               |        |                 |                            |                      |                                                       |     |                          |                                                                                                                                          |
| 28 |                              |     |     |                                                                               |        |                 |                            |                      |                                                       |     |                          |                                                                                                                                          |
| 29 |                              |     |     |                                                                               |        |                 |                            |                      |                                                       |     |                          |                                                                                                                                          |
| 30 |                              |     |     |                                                                               |        |                 |                            |                      |                                                       |     |                          |                                                                                                                                          |
| 31 | <b>Zahm 2016</b>             | 93  | 728 | CRP, IL-6, TNF- $\alpha$                                                      | Serum  | Cross-sectional | No. (fasting, duration nr) | Fasted, duration nr. | ELISA                                                 | Yes | No                       | Age, sex, SES, BMI, illicit substance use, alcohol use, smoking status, physical activity, physical illness                              |
| 32 |                              |     |     |                                                                               |        |                 |                            |                      |                                                       |     |                          |                                                                                                                                          |
| 33 |                              |     |     |                                                                               |        |                 |                            |                      |                                                       |     |                          |                                                                                                                                          |

nr (not reported), C-reactive protein (CRP), interleukin (IL-), tumour necrosis factor- $\alpha$  (TNF- $\alpha$ ), interferon- $\gamma$  (IFN- $\gamma$ ), stromal derived factor-1 (SDF-1), monocyte chemoattractant protein-1 (MCP-1), chemokine C-C motif ligand 5 (CCL-5), granulocyte-macrophage colony-stimulating factor (GM-CSF), enzyme linked-immuno-sorbent assay (ELISA), erythrocyte sedimentation rate (ESR), mg (milligrams), l (litre), socioeconomic status (SES), body mass index (BMI), major depressive disorder (MDD)

**Table 3. Summary inflammatory marker findings in GAD**

| Study                                       | N          |            | Finding                                                                                                                                                                              |
|---------------------------------------------|------------|------------|--------------------------------------------------------------------------------------------------------------------------------------------------------------------------------------|
|                                             | Controls   | n with GAD |                                                                                                                                                                                      |
| <b>C-reactive protein (CRP)</b>             |            |            |                                                                                                                                                                                      |
| Bankier et al. 2008                         | 30         | 15         | ↑ in GAD with co-morbid CVD compared to controls using a dichotomous outcome of CRP cut off score (CRP >3mg/l).                                                                      |
| Copeland et al. 2012                        | 5664       | 146        | Longitudinal study in adolescents: ↑ bivariate association both cross-sectionally & over time between GAD & elevated CRP, but accounted for by medication use & BMI.                 |
| De Berardis et al. 2017                     | no control | 70         | ↑ in GAD patients with co-morbid alexithymia and with increased suicidal ideation, no control group.                                                                                 |
| Khandaker et al. 2016                       | 3392       | 26         | ↑ in 16 year olds with GAD compared to controls, remained ↑ after adjusting for co-variates.                                                                                         |
| Korkelia et al. 2010                        |            | 116        | ↓ in non-smoking women with diagnosis of GAD compared to controls, however control group not described.                                                                              |
| Nayek et al. 2016                           | 50         | 50         | ↑ in GAD patients compared to controls.                                                                                                                                              |
| Tang et al. 2017                            | 48         | 48         | ↑ in GAD patients compared to controls and ↑ with increased severity of GAD.                                                                                                         |
| Vogelzangs et al. 2013                      | 556        | 454        | ↑ in GAD patients compared to controls in unadjusted data obtained from author.                                                                                                      |
| Zahm 2016                                   | 728        | 93         | ↔ between those with & without a current GAD diagnosis (p = 0.28) or with & without a lifetime GAD diagnosis, using a combined inflammatory index of CRP, IL-6 & TNF-α measurements. |
| <b>Interleukin 1 (IL-1)</b>                 |            |            |                                                                                                                                                                                      |
| Yang et al. 2017                            | 41         | 28         | ↑ sputum IL-1 in patients aged 50-60 years old with GAD compared to controls.                                                                                                        |
| <b>Interleukin 1α (IL-1α)</b>               |            |            |                                                                                                                                                                                      |
| Tang et al. 2017                            | 48         | 48         | ↑ IL-1α in GAD patients compared to controls and ↑ with increased severity of GAD.                                                                                                   |
| <b>Interleukin 2 (IL-2)</b>                 |            |            |                                                                                                                                                                                      |
| Tang et al. 2017                            | 48         | 48         | ↑ in GAD patients compared to controls (p <0.001) but ↔ with severity of GAD.                                                                                                        |
| Tofani et al. 2015                          | 10         | 14         | ↔ in GAD patients compared to controls.                                                                                                                                              |
| <b>Interleukin 4 (IL-4)</b>                 |            |            |                                                                                                                                                                                      |
| Hou et al. 2017                             | 64         | 54         | ↔ in GAD patients compared to controls.                                                                                                                                              |
| <b>Interleukin 5 (IL-5)</b>                 |            |            |                                                                                                                                                                                      |
| Tang et al. 2017                            | 48         | 48         | ↔ in GAD patients compared to controls, or association with severity of GAD.                                                                                                         |
| <b>Interleukin 6 (IL-6)</b>                 |            |            |                                                                                                                                                                                      |
| Hoge et al. 2016                            | -          | 70         | No control group: RCT of psychological intervention in GAD                                                                                                                           |
| Tang et al. 2017                            | 48         | 48         | ↑ in GAD patients compared to controls & ↑ with increased severity of GAD.                                                                                                           |
| Vogelzangs et al. 2013                      | 556        | 454        | ↑ in GAD patients compared to controls in unadjusted data obtained from author, but ↔ between IL-6 & GAD compared to other anxiety disorders.                                        |
| Yang et al. 2017                            | 41         | 28         | ↑ sputum in GAD patients aged 50-60 years old compared to controls.                                                                                                                  |
| Zahm 2016                                   | 728        | 93         | ↔ between those with & without a current GAD diagnosis or with & without a lifetime GAD diagnosis, using a combined inflammatory index of CRP, IL-6 & TNF-α measurements.            |
| <b>Interleukin 8 (IL-8)</b>                 |            |            |                                                                                                                                                                                      |
| Tang et al. 2017                            | 48         | 48         | ↑ in GAD patients compared to controls and ↑ with increased severity of GAD.                                                                                                         |
| <b>Interleukin 10 (IL-10)</b>               |            |            |                                                                                                                                                                                      |
| Hou et al. 2017                             | 64         | 54         | ↓ in GAD patients compared to controls, which remained ↓ after adjustment for co-variates.                                                                                           |
| Tofani et al. 2015                          | 10         | 14         | ↑ in GAD compared to controls.                                                                                                                                                       |
| <b>Interleukin 12p70 (IL-12p70)</b>         |            |            |                                                                                                                                                                                      |
| Tang et al. 2017                            | 48         | 48         | ↑ in GAD patients compared to controls but ↔ with severity of GAD.                                                                                                                   |
| <b>Interferon gamma (IFN-γ)</b>             |            |            |                                                                                                                                                                                      |
| Hou et al. 2017                             | 64         | 54         | ↑ in GAD patients compared to controls which remained ↑ after adjustment for co-variates.                                                                                            |
| Korkelia et al. 2010                        |            | 116        | ↓ in non-smoking women with diagnosis of GAD compared to controls, however control group not described.                                                                              |
| Tang et al. 2017                            | 48         | 48         | ↑ in GAD patients compared to controls and ↑ with increased severity of GAD.                                                                                                         |
| <b>Tumour necrosis factor-alpha (TNF-α)</b> |            |            |                                                                                                                                                                                      |
| Hoge et al. 2016                            | -          | 70         | No control group: RCT of psychological intervention in GAD                                                                                                                           |

|    |                                                                                                                                                                                                                                                                                                                                                                                         |     |     |                                                                                                                                                                           |
|----|-----------------------------------------------------------------------------------------------------------------------------------------------------------------------------------------------------------------------------------------------------------------------------------------------------------------------------------------------------------------------------------------|-----|-----|---------------------------------------------------------------------------------------------------------------------------------------------------------------------------|
| 1  | Hou et al. 2017                                                                                                                                                                                                                                                                                                                                                                         | 64  | 54  | ↑ in GAD patients compared to controls which remained ↑ after adjustment co-variables.                                                                                    |
| 2  | Korkelia et al. 2010                                                                                                                                                                                                                                                                                                                                                                    |     | 116 | ↑ in non-smoking women with a diagnosis of GAD compared to controls, though control group was not described.                                                              |
| 3  | Vogelzangs et al 2013                                                                                                                                                                                                                                                                                                                                                                   | 556 | 454 | ↔ in GAD patients compared to controls, & ↔ between TNF-α & GAD compared to other anxiety disorders.                                                                      |
| 4  | Yang et al. 2017                                                                                                                                                                                                                                                                                                                                                                        | 41  | 28  | ↑ sputum TNF-α in GAD patients aged 50-60 years old compared to controls.                                                                                                 |
| 5  | Zahm 2016                                                                                                                                                                                                                                                                                                                                                                               | 728 | 93  | ↔ between those with & without a current GAD diagnosis or with & without a lifetime GAD diagnosis, using a combined inflammatory index of CRP, IL-6 & TNF-α measurements. |
| 6  | <b>Chemokine C-C motif ligand 5 (CCL-5) / Regulated on activation, normal T cell expressed and secreted (RANTES)</b>                                                                                                                                                                                                                                                                    |     |     |                                                                                                                                                                           |
| 7  | Oglodek et al. 2015                                                                                                                                                                                                                                                                                                                                                                     | 40  | 120 | ↑ in males with GAD & comorbid personality disorder compared to controls                                                                                                  |
| 8  | <b>Monocyte chemoattractant protein-1 (MCP-1)</b>                                                                                                                                                                                                                                                                                                                                       |     |     |                                                                                                                                                                           |
| 9  | Oglodek et al. 2015                                                                                                                                                                                                                                                                                                                                                                     | 40  | 120 | ↑ in GAD & comorbid personality disorder compared to controls                                                                                                             |
| 10 | <b>Stromal derived factor-1 (SDF-1)</b>                                                                                                                                                                                                                                                                                                                                                 |     |     |                                                                                                                                                                           |
| 11 | Oglodek et al. 2015                                                                                                                                                                                                                                                                                                                                                                     | 40  | 120 | ↑ in GAD & comorbid personality disorder compared to controls                                                                                                             |
| 12 | <b>Granulocyte-macrophage colony-stimulating factor (GM-CSF)</b>                                                                                                                                                                                                                                                                                                                        |     |     |                                                                                                                                                                           |
| 13 | Tang et al. 2017                                                                                                                                                                                                                                                                                                                                                                        | 48  | 48  | ↑ in GAD patients compared to controls and ↑ with increased severity of GAD.                                                                                              |
| 14 | ↑ = statistically significant increase in inflammatory marker in people with GAD compared to controls (p<0.05), ↓ = statistically significant decrease in inflammatory marker in people with GAD compared to controls (p<0.05), ↔ = no statistically significant difference in inflammatory marker in people with GAD compared to controls (p>0.05). RCT = randomised controlled trial. |     |     |                                                                                                                                                                           |

**Table 4. Study quality assessment: Newcastle Ottawa scale**

|                                | <u>Adequate case definition</u> | <u>Cases representative</u> | <u>Selection of Controls</u> | <u>Definition of Controls</u> | <u>Comparability of design &amp; analysis</u> | <u>Ascertainment of exposure</u> | <u>Same method of ascertainment</u> | <u>Non-response rate</u> | <b>TOTAL stars:</b> |
|--------------------------------|---------------------------------|-----------------------------|------------------------------|-------------------------------|-----------------------------------------------|----------------------------------|-------------------------------------|--------------------------|---------------------|
| <b>Bankier et al. 2008</b>     | ◇                               | -                           | ◇                            | ◇                             | ◇◇                                            | ◇                                | ◇                                   | ◇                        | <b>*8*</b>          |
| <b>Copeland et al. 2012</b>    | ◇                               | ◇                           | ◇                            | ◇                             | ◇◇                                            | ◇                                | ◇                                   | -                        | <b>*8*</b>          |
| <b>De Berardis et al. 2017</b> | ◇                               | -                           | na                           | na                            | na                                            | ◇                                | na                                  | -                        | <b>*2*</b>          |
| <b>Hoge et al. 2016</b>        | ◇                               | -                           | na                           | na                            | na                                            | ◇                                | na                                  | -                        | <b>*2*</b>          |
| <b>Hou et al. 2017</b>         | ◇                               | ◇                           | ◇                            | ◇                             | ◇◇                                            | ◇                                | ◇                                   | -                        | <b>*8*</b>          |
| <b>Khandaker et al. 2016</b>   | ◇                               | ◇                           | ◇                            | ◇                             | ◇◇                                            | ◇                                | ◇                                   | ◇                        | <b>*9*</b>          |
| <b>Korkelia et al. 2010</b>    | ◇                               | -                           | ◇                            | -                             | ◇                                             | -                                | ◇                                   | -                        | <b>*4*</b>          |
| <b>Nayek et al. 2016</b>       | ◇                               | -                           | ◇                            | -                             | ◇◇                                            | ◇                                | ◇                                   | -                        | <b>*6*</b>          |
| <b>Oglodek et al. 2015</b>     | ◇                               | -                           | ◇                            | ◇                             | ◇◇                                            | -                                | ◇                                   | -                        | <b>*6*</b>          |
| <b>Tang et al. 2017</b>        | ◇                               | ◇                           | ◇                            | ◇                             | ◇◇                                            | ◇                                | ◇                                   | -                        | <b>*8*</b>          |
| <b>Tofani et al. 2015</b>      | ◇                               | -                           | -                            | -                             | ◇                                             | ◇                                | ◇                                   | -                        | <b>*4*</b>          |
| <b>Vogelzangs et al. 2013</b>  | ◇                               | ◇                           | ◇                            | ◇                             | ◇◇                                            | ◇                                | ◇                                   | ◇                        | <b>*9*</b>          |
| <b>Yang et al. 2017</b>        | ◇                               | ◇                           | -                            | ◇                             | ◇◇                                            | ◇                                | ◇                                   | -                        | <b>*7*</b>          |
| <b>Zahm 2016</b>               | ◇                               | -                           | -                            | -                             | ◇◇                                            | ◇                                | ◇                                   | -                        | <b>*5*</b>          |

◇ = met criteria, - = did not meet criteria, na = not applicable



Table 5. Additional critical appraisal

|                                | Type of publication | Unrepresentative recruitment methods           | Unrepresentative demographics                           | Between group differences reported | Adjusted for between-group differences |
|--------------------------------|---------------------|------------------------------------------------|---------------------------------------------------------|------------------------------------|----------------------------------------|
| <b>Bankier et al. 2008</b>     | Paper               | Yes. Recruited from cardiology clinic.         | Yes. Older cohort due to cardiac co-morbidity required. | nr                                 | nr                                     |
| <b>Copeland et al. 2012</b>    | Paper               | No.                                            | Yes. Aged 9-21 only.                                    | Yes                                | Yes                                    |
| <b>De Berardis et al. 2017</b> | Paper               | No                                             | No (aged 18-45)                                         | No control                         | No control                             |
| <b>Hoge et al. 2016</b>        | Paper               | Yes recruited by advert as part of parent RCT  | No (aged >18)                                           | No control                         | No control                             |
| <b>Hou et al. 2017</b>         | Paper               | No                                             | No (aged 18-65)                                         | Yes                                | Yes                                    |
| <b>Khandaker et al. 2016</b>   | Paper               | No                                             | Yes, aged 16 years old only                             | Yes                                | Yes                                    |
| <b>Korkelia et al. 2010</b>    | Abstract            | Yes, recruited from existing study in Finland. | Yes. Non-smoking women only.                            | No                                 | Yes (BMI only)                         |
| <b>Nayek et al. 2016</b>       | Paper               | Yes, inpatients only                           | No, (aged 18-65)                                        | Yes                                | Yes                                    |
| <b>Oglodek et al. 2015</b>     | Paper               | Yes, co-morbid personality disorder            | No                                                      | Yes                                | No                                     |
| <b>Tang et al. 2017</b>        | Paper               | No                                             | No, (aged 18-60)                                        | Yes                                | Yes                                    |
| <b>Tofani et al. 2015</b>      | Abstract            | Recruitment method not stated                  | nr                                                      | nr                                 | nr                                     |
| <b>Vogelzangs et al. 2013</b>  | Paper               | No                                             | No (aged 18-65)                                         | Yes                                | Yes                                    |
| <b>Yang et al. 2017</b>        | Paper               | No                                             | Yes, (aged 50-60).                                      | Yes                                | Yes                                    |
| <b>Zahm 2016</b>               | Dissertation        | Yes, cardiology patients only.                 | Yes, (aged >50)                                         | Yes                                | Yes                                    |

## References

1. Réus GZ, Fries GR, Stertz L, et al. The role of inflammation and microglial activation in the pathophysiology of psychiatric disorders. *Neuroscience*. 2015. doi:10.1016/j.neuroscience.2015.05.018
2. Brown AS, Vinogradov S, Kremen WS, et al. Prenatal exposure to maternal infection and executive dysfunction in adult schizophrenia. *Am J Psychiatry*. 2009. doi:10.1176/appi.ajp.2008.08010089
3. Benros ME, Waltoft BL, Nordentoft M, et al. Autoimmune diseases and severe infections as risk factors for mood disorders: A nationwide study. *JAMA Psychiatry*. 2013. doi:10.1001/jamapsychiatry.2013.1111
4. O'dushlaine C, Rossin L, Lee PH, et al. Psychiatric genome-wide association study analyses implicate neuronal, immune and histone pathways. *Nat Neurosci*. 2015. doi:10.1038/nn.3922
5. Khandaker GM, Cousins L, Deakin J, Lennox BR, Yolken R, Jones PB. Inflammation and immunity in schizophrenia: Implications for pathophysiology and treatment. *The Lancet Psychiatry*. 2015. doi:10.1016/S2215-0366(14)00122-9
6. Howren MB, Lamkin DM, Suls J. Associations of depression with c-reactive protein, IL-1, and IL-6: A meta-analysis. *Psychosom Med*. 2009. doi:10.1097/PSY.0b013e3181907c1b
7. Gray SM, Bloch MH. Systematic review of proinflammatory cytokines in obsessive-compulsive disorder. *Curr Psychiatry Rep*. 2012. doi:10.1007/s11920-012-0272-0
8. Munkholm K, Vinberg M, Vedel Kessing L. Cytokines in bipolar disorder: A systematic review and meta-analysis. *J Affect Disord*. 2013. doi:10.1016/j.jad.2012.06.010
9. Meyer U, Feldon J. Neural basis of psychosis-related behaviour in the infection model of schizophrenia. *Behav Brain Res*. 2009. doi:10.1016/j.bbr.2008.12.022
10. Goldsmith DR, Rapaport MH, Miller BJ. A meta-analysis of blood cytokine network alterations in psychiatric patients: Comparisons between schizophrenia, bipolar disorder and depression. In: *Molecular Psychiatry*. ; 2016. doi:10.1038/mp.2016.3
11. Rao JS, Harry GJ, Rapoport SI, Kim HW. Increased excitotoxicity and neuroinflammatory markers in postmortem frontal cortex from bipolar disorder patients. *Mol Psychiatry*. 2010. doi:10.1038/mp.2009.47
12. Khairova RA, Machado-Vieira R, Du J, Manji HK. A potential role for pro-inflammatory cytokines in regulating synaptic plasticity in major depressive disorder. *Int J Neuropsychopharmacol*. 2009. doi:10.1017/S1461145709009924
13. Kubera M, Obuchowicz E, Goehler L, Brzeszcz J, Maes M. In animal models, psychosocial stress-induced (neuro)inflammation, apoptosis and reduced neurogenesis are associated to the onset of depression. *Prog Neuro-Psychopharmacology Biol Psychiatry*. 2011. doi:10.1016/j.pnpbp.2010.08.026
14. Furtado M, Katzman MA. Neuroinflammatory pathways in anxiety, posttraumatic stress, and obsessive compulsive disorders. *Psychiatry Res*. 2015. doi:10.1016/j.psychres.2015.05.036
15. Andlin-Sobocki P, Wittchen HU. Cost of anxiety disorders in Europe. *Eur J Neurol*. 2005. doi:10.1111/j.1468-1331.2005.01196.x
16. Baxter AJ, Scott KM, Vos T, Whiteford HA. Global prevalence of anxiety disorders: A systematic review and meta-regression. *Psychol Med*. 2013. doi:10.1017/S003329171200147X
17. Bystritsky A. Treatment-resistant anxiety disorders. *Mol Psychiatry*. 2006. doi:10.1038/sj.mp.4001852
18. Bruce SE, Yonkers KA, Otto MW, et al. Influence of psychiatric comorbidity on recovery and recurrence in generalized anxiety disorder, social phobia, and panic disorder: A 12-year prospective study. *Am J Psychiatry*. 2005. doi:10.1176/appi.ajp.162.6.1179
19. Baldwin D, Woods R, Lawson R, Taylor D. Efficacy of drug treatments for generalised anxiety disorder: Systematic review and meta-analysis. *BMJ*. 2011. doi:10.1136/bmj.d1199
20. Cuijpers P, Sijbrandij M, Koole S, Huibers M, Berking M, Andersson G. Psychological treatment of generalized anxiety disorder: A meta-analysis. *Clin Psychol Rev*. 2014. doi:10.1016/j.cpr.2014.01.002

21. Härter MC, Conway KP, Merikangas KR. Associations between anxiety disorders and physical illness. *Eur Arch Psychiatry Clin Neurosci*. 2003. doi:10.1007/s00406-003-0449-y
22. Roy-Byrne PP, Davidson KW, Kessler RC, et al. Anxiety disorders and comorbid medical illness. *Gen Hosp Psychiatry*. 2008. doi:10.1016/j.genhosppsych.2007.12.006
23. Uguz F, Akman C, Kucuksarac S, Tufekci O. Anti-tumor necrosis factor- $\alpha$  therapy is associated with less frequent mood and anxiety disorders in patients with rheumatoid arthritis. *Psychiatry Clin Neurosci*. 2009. doi:10.1111/j.1440-1819.2008.01905.x
24. Passos IC, Vasconcelos-Moreno MP, Costa LG, et al. Inflammatory markers in post-traumatic stress disorder: A systematic review, meta-analysis, and meta-regression. *The Lancet Psychiatry*. 2015. doi:10.1016/S2215-0366(15)00309-0
25. Michopoulos V, Powers A, Gillespie CF, Ressler KJ, Jovanovic T. Inflammation in Fear-and Anxiety-Based Disorders: PTSD, GAD, and beyond. *Neuropsychopharmacology*. 2017. doi:10.1038/npp.2016.146
26. Liberati A, Altman DG, Tetzlaff J, et al. The PRISMA statement for reporting systematic reviews and meta-analyses of studies that evaluate health care interventions: explanation and elaboration. In: *Journal of Clinical Epidemiology*. ; 2009. doi:10.1016/j.jclinepi.2009.06.006
27. Spitzer R, Williams J, Gibbon M, First M. Structured Clinical Interview for DSM-IV. In: *Encyclopedia of Behavioral Medicine*. ; 1994. doi:10.1007/978-1-4419-1005-9\_66
28. Wells G, Shea B, O'Connell D, et al. *The Newcastle-Ottawa Scale (NOS) for Assessing the Quality of Nonrandomized Studies in Meta-Analyses*. ; 2013. doi:10.2307/632432
29. Higgins JPT. Measuring inconsistency in meta-analyses. *BMJ*. 2003. doi:10.1136/bmj.327.7414.557
30. Kitahara CM, Trabert B, Katki HA, et al. Body mass index, physical activity, and serum markers of inflammation, immunity, and insulin resistance. *Cancer Epidemiol Biomarkers Prev*. 2014. doi:10.1158/1055-9965.EPI-14-0699-T
31. Petrovsky N, McNair P, Harrison LC. Diurnal rhythms of pro-inflammatory cytokines: Regulation by plasma cortisol and therapeutic implications. *Cytokine*. 1998. doi:10.1006/cyto.1997.0289
32. Akdis M, Aab A, Altunbulakli C, et al. Interleukins (from IL-1 to IL-38), interferons, transforming growth factor  $\beta$ , and TNF- $\alpha$ : Receptors, functions, and roles in diseases. *J Allergy Clin Immunol*. 2016. doi:10.1016/j.jaci.2016.06.033
33. Khandaker GM, Jones PB, Zammit S, Lewis G. Association between serum C-reactive protein and DSM-IV generalized anxiety disorder in adolescence: Findings from the ALSPAC cohort. *Neurobiol Stress*. 2016;4:55-61. doi:10.1016/j.ynstr.2016.02.003
34. Nayek S, Ghosh S. A Comparative Study Of Serum C-Reactive Protein In Patients With Generalised Anxiety Disorder And Depression. *Indian J Psychiatry*. 2017;59(6, 2):S217.
35. Tang Z, Ye G, Chen X, et al. Peripheral proinflammatory cytokines in Chinese patients with generalised anxiety disorder. *J Affect Disord*. 2018;225:593-598. doi:10.1016/j.jad.2017.08.082
36. Vogelzangs N, Beekman ATF, de Jonge P, Penninx BWJH. Anxiety disorders and inflammation in a large adult cohort. *Transl Psychiatry*. 2013;3:e249. doi:10.1038/tp.2013.27
37. Sterne JAC, Sutton AJ, Ioannidis JPA, et al. Recommendations for examining and interpreting funnel plot asymmetry in meta-analyses of randomised controlled trials. *BMJ*. 2011. doi:10.1136/bmj.d4002
38. Bankier B, Barajas J, Martinez-Rumayor A, Januzzi JL. Association between C-reactive protein and generalized anxiety disorder in stable coronary heart disease patients. *Eur Heart J*. 2008;29(18):2212-2217. doi:10.1093/eurheartj/ehn326
39. Copeland WE, Shanahan L, Worthman C, Angold A, Costello EJ. Generalized anxiety and C-reactive protein levels: A prospective, longitudinal analysis. *Psychol Med*. 2012;42(12):2641-2650. doi:10.1017/S0033291712000554
40. Korkeila J, Runsten S, Ollikainen S, Korkeila K. Generalized anxiety disorder and immunity markers in a stratified population sample. *Eur Psychiatry*. 2010;25. doi:10.1016/S0924-9338%2810%2971560-1
41. Zahm JL. Generalized anxiety disorder and inflammatory biomarkers in coronary heart disease: Sex-specific effects. *Diss Abstr Int Sect B Sci Eng*. 2018;78(12).
42. De Berardis D, Serroni N, Campanella D, et al. Alexithymia, suicide ideation, C-Reactive Protein, and serum lipid levels among outpatients with generalized anxiety disorder. *Arch Suicide Res*. 2017;21(1):100-112. doi:10.1080/13811118.2015.1004485

- 1 43. Raison CL, Knight JM, Pariante C. Interleukin (IL)-6: A good kid hanging out with bad friends (and  
2 why sauna is good for health). *Brain, Behavior, and Immunity*. 2018.
- 3 44. Hoge EA, Bui E, Palitz SA, et al. The effect of mindfulness meditation training on biological acute  
4 stress responses in generalized anxiety disorder. *Psychiatry Res*. 2017;No.  
5 doi:10.1016/j.psychres.2017.01.006
- 6 45. Yang CJ, Liu D, Du YJ, Xu ZS, Shi SX. The pro-inflammatory cytokines, salivary cortisol and alpha-  
7 amylase are associated with generalized anxiety disorder (GAD) in patients with asthma. *Neurosci*  
8 *Lett*. 2017;656:15-21. doi:10.1016/j.neulet.2017.07.021
- 9 46. Tofani T, Pallanti S, Di Cesare Mannelli L, Zanardelli M, Ghelardini C. An immunologic profile  
10 study in drug-naive generalized anxiety non depressed patients: A pilot study. *Eur*  
11 *Neuropsychopharmacol*. 2015;25.
- 12 47. Hou R, Garner M, Holmes C, et al. Peripheral inflammatory cytokines and immune balance in  
13 Generalised Anxiety Disorder: Case-controlled study. *Brain Behav Immun*. 2017;62:212-218.  
14 doi:10.1016/j.bbi.2017.01.021
- 15 48. Oglodek EA, Szota AM, Araszkievicz A, Just MJ, Mos DM. The MCP-1, CCL-5 and SDF-1  
16 chemokines as pro-inflammatory markers in generalized anxiety disorder and personality disorders.  
17 *Pharmacol Reports*. 2015;67(1):85-89. doi:10.1016/j.pharep.2014.08.006
- 18 49. Miller BJ, Culpepper N, Rapaport MH. C-reactive protein levels in schizophrenia: A review and  
19 meta-analysis. *Clin Schizophr Relat Psychoses*. 2014. doi:10.3371/CSRP.MICU.020813
- 20 50. Byers AL, Yaffe K, Covinsky KE, Friedman MB, Bruce ML. High occurrence of mood and anxiety  
21 disorders among older adults: The National Comorbidity Survey Replication. *Arch Gen Psychiatry*.  
22 2010. doi:10.1001/archgenpsychiatry.2010.35
- 23 51. Wolitzky-Taylor KB, Castriotta N, Lenze EJ, Stanley MA, Craske MG. Anxiety disorders in older  
24 adults: A comprehensive review. *Depress Anxiety*. 2010. doi:10.1002/da.20653
- 25 52. Wetherell JL, Liu L, Patterson TL, et al. Acceptance and Commitment Therapy for Generalized  
26 Anxiety Disorder in Older Adults: A Preliminary Report. *Behav Ther*. 2011.  
27 doi:10.1016/j.beth.2010.07.002
- 28 53. Felger JC, Lotrich FE. Inflammatory cytokines in depression: Neurobiological mechanisms and  
29 therapeutic implications. *Neuroscience*. 2013. doi:10.1016/j.neuroscience.2013.04.060
- 30 54. Miller AH, Raison CL. The role of inflammation in depression: From evolutionary imperative to  
31 modern treatment target. *Nat Rev Immunol*. 2016. doi:10.1038/nri.2015.5
- 32 55. Xanthos DN, Sandkühler J. Neurogenic neuroinflammation: Inflammatory CNS reactions in response  
33 to neuronal activity. *Nat Rev Neurosci*. 2014. doi:10.1038/nrn3617
- 34 56. Reichert JM, Rosensweig CJ, Faden LB, Dewitz MC. Monoclonal antibody successes in the clinic.  
35 *Nat Biotechnol*. 2005. doi:10.1038/nbt0905-1073
- 36 57. Khandaker GM, Zuber V, Rees JM, et al. Shared mechanisms between coronary heart disease and  
37 depression: findings from a large UK general population-based cohort. *bioRxiv*. 2019.  
38 doi:10.1101/533828
- 39 58. Miller BJ, Buckley PF. The Case for Adjunctive Monoclonal Antibody Immunotherapy in  
40 Schizophrenia. *Psychiatr Clin North Am*. 2016. doi:10.1016/j.psc.2016.01.003
- 41
- 42
- 43
- 44
- 45
- 46
- 47
- 48
- 49
- 50
- 51
- 52
- 53
- 54
- 55
- 56
- 57
- 58
- 59
- 60

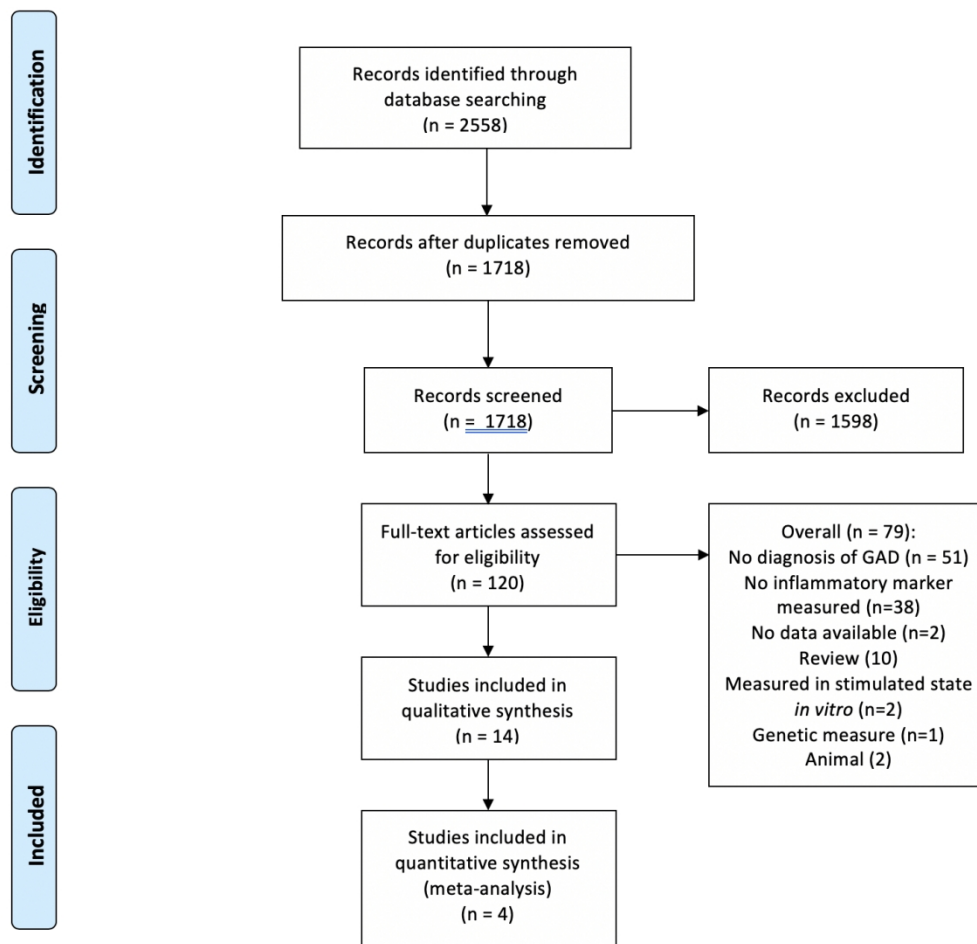

Figure 1. Flow of studies in the systematic review and meta-analysis

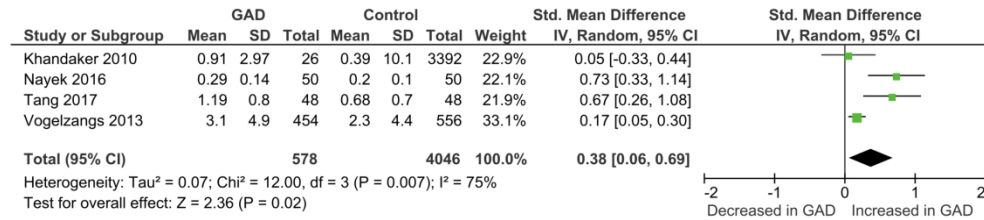

Figure 2. Forest plot of random effects meta-analysis of CRP levels in GAD vs controls.

**MEDLINE SEARCH STRATEGY:**

("inflammat\*" OR "cytokine" OR "interferon" OR "IFN" OR "interleukin" OR "translocator protein" OR "TSPO" OR "tumour necrosis factor" OR "tumor necrosis factor" OR "TNF" OR "IL-1" OR "IL-2" OR "IL-4" OR "IL-7" OR "IL-6" OR IL-8 OR IL-10 OR migroglia OR t-cell OR lymphocyte OR "C-reactive protein" OR "C reactive protein" OR CRP OR "acute phase protein" OR "fibrinogen") AND ("generalised anxiety disorder" OR "generalized anxiety disorder" OR "GAD" OR "worry").

For peer review only



# PRISMA 2009 Checklist

| Section/topic                      | #  | Checklist item                                                                                                                                                                                                                                                                                              | Reported on page # |
|------------------------------------|----|-------------------------------------------------------------------------------------------------------------------------------------------------------------------------------------------------------------------------------------------------------------------------------------------------------------|--------------------|
| <b>TITLE</b>                       |    |                                                                                                                                                                                                                                                                                                             |                    |
| Title                              | 1  | Identify the report as a systematic review, meta-analysis, or both.                                                                                                                                                                                                                                         | 1                  |
| <b>ABSTRACT</b>                    |    |                                                                                                                                                                                                                                                                                                             |                    |
| Structured summary                 | 2  | Provide a structured summary including, as applicable: background; objectives; data sources; study eligibility criteria, participants, and interventions; study appraisal and synthesis methods; results; limitations; conclusions and implications of key findings; systematic review registration number. | 2                  |
| <b>INTRODUCTION</b>                |    |                                                                                                                                                                                                                                                                                                             |                    |
| Rationale                          | 3  | Describe the rationale for the review in the context of what is already known.                                                                                                                                                                                                                              | 2-3                |
| Objectives                         | 4  | Provide an explicit statement of questions being addressed with reference to participants, interventions, comparisons, outcomes, and study design (PICOS).                                                                                                                                                  | 3-4                |
| <b>METHODS</b>                     |    |                                                                                                                                                                                                                                                                                                             |                    |
| Protocol and registration          | 5  | Indicate if a review protocol exists, if and where it can be accessed (e.g., Web address), and, if available, provide registration information including registration number.                                                                                                                               | 3-4                |
| Eligibility criteria               | 6  | Specify study characteristics (e.g., PICOS, length of follow-up) and report characteristics (e.g., years considered, language, publication status) used as criteria for eligibility, giving rationale.                                                                                                      | 4                  |
| Information sources                | 7  | Describe all information sources (e.g., databases with dates of coverage, contact with study authors to identify additional studies) in the search and date last searched.                                                                                                                                  | 4                  |
| Search                             | 8  | Present full electronic search strategy for at least one database, including any limits used, such that it could be repeated.                                                                                                                                                                               | 4                  |
| Study selection                    | 9  | State the process for selecting studies (i.e., screening, eligibility, included in systematic review, and, if applicable, included in the meta-analysis).                                                                                                                                                   | 4                  |
| Data collection process            | 10 | Describe method of data extraction from reports (e.g., piloted forms, independently, in duplicate) and any processes for obtaining and confirming data from investigators.                                                                                                                                  | 4                  |
| Data items                         | 11 | List and define all variables for which data were sought (e.g., PICOS, funding sources) and any assumptions and simplifications made.                                                                                                                                                                       | 4                  |
| Risk of bias in individual studies | 12 | Describe methods used for assessing risk of bias of individual studies (including specification of whether this was done at the study or outcome level), and how this information is to be used in any data synthesis.                                                                                      | 5                  |
| Summary measures                   | 13 | State the principal summary measures (e.g., risk ratio, difference in means).                                                                                                                                                                                                                               | 5                  |
| Synthesis of results               | 14 | Describe the methods of handling data and combining results of studies, if done, including measures of consistency (e.g., I <sup>2</sup> ) for each meta-analysis.                                                                                                                                          | 5                  |



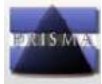

# PRISMA 2009 Checklist

Page 1 of 2

| Section/topic                 | #  | Checklist item                                                                                                                                                                                           | Reported on page # |
|-------------------------------|----|----------------------------------------------------------------------------------------------------------------------------------------------------------------------------------------------------------|--------------------|
| Risk of bias across studies   | 15 | Specify any assessment of risk of bias that may affect the cumulative evidence (e.g., publication bias, selective reporting within studies).                                                             | 4-5                |
| Additional analyses           | 16 | Describe methods of additional analyses (e.g., sensitivity or subgroup analyses, meta-regression), if done, indicating which were pre-specified.                                                         | 5                  |
| <b>RESULTS</b>                |    |                                                                                                                                                                                                          |                    |
| Study selection               | 17 | Give numbers of studies screened, assessed for eligibility, and included in the review, with reasons for exclusions at each stage, ideally with a flow diagram.                                          | 5                  |
| Study characteristics         | 18 | For each study, present characteristics for which data were extracted (e.g., study size, PICOS, follow-up period) and provide the citations.                                                             | 5                  |
| Risk of bias within studies   | 19 | Present data on risk of bias of each study and, if available, any outcome level assessment (see item 12).                                                                                                | 5-6                |
| Results of individual studies | 20 | For all outcomes considered (benefits or harms), present, for each study: (a) simple summary data for each intervention group (b) effect estimates and confidence intervals, ideally with a forest plot. | 6                  |
| Synthesis of results          | 21 | Present results of each meta-analysis done, including confidence intervals and measures of consistency.                                                                                                  | 6                  |
| Risk of bias across studies   | 22 | Present results of any assessment of risk of bias across studies (see Item 15).                                                                                                                          | 5-6                |
| Additional analysis           | 23 | Give results of additional analyses, if done (e.g., sensitivity or subgroup analyses, meta-regression [see Item 16]).                                                                                    | 6                  |
| <b>DISCUSSION</b>             |    |                                                                                                                                                                                                          |                    |
| Summary of evidence           | 24 | Summarize the main findings including the strength of evidence for each main outcome; consider their relevance to key groups (e.g., healthcare providers, users, and policy makers).                     | 6-11               |
| Limitations                   | 25 | Discuss limitations at study and outcome level (e.g., risk of bias), and at review-level (e.g., incomplete retrieval of identified research, reporting bias).                                            | 6-11               |
| Conclusions                   | 26 | Provide a general interpretation of the results in the context of other evidence, and implications for future research.                                                                                  | 11-12              |
| <b>FUNDING</b>                |    |                                                                                                                                                                                                          |                    |
| Funding                       | 27 | Describe sources of funding for the systematic review and other support (e.g., supply of data); role of funders for the systematic review.                                                               | 12                 |

From: Moher D, Liberati A, Tetzlaff J, Altman DG, The PRISMA Group (2009). Preferred Reporting Items for Systematic Reviews and Meta-Analyses: The PRISMA Statement. PLoS Med 6(7): e1000097. doi:10.1371/journal.pmed1000097

For more information, visit: [www.prisma-statement.org](http://www.prisma-statement.org).

Page 2 of 2

For peer review only - <http://bmjopen.bmj.com/site/about/guidelines.xhtml>
