# Supplementary material for: Systematic review and meta-analysis of the association between peripheral inflammatory cytokines and generalised anxiety disorder
Source: PubMed Central journal article supplement (PMC6661660; doi:10.1136/bmjopen-2018-027925), 2019-07-19
Supplement: bmjopen-2018-027925.reviewer_comments.pdf [file bmjopen-2018-027925.reviewer_comments.pdf]

## PEER REVIEW HISTORY

BMJ Open publishes all reviews undertaken for accepted manuscripts. Reviewers are asked to complete a checklist review form (<http://bmjopen.bmj.com/site/about/resources/checklist.pdf>) and are provided with free text boxes to elaborate on their assessment. These free text comments are reproduced below.

## ARTICLE DETAILS

|                            |                                                                                                                                     |
|----------------------------|-------------------------------------------------------------------------------------------------------------------------------------|
| <b>TITLE (PROVISIONAL)</b> | A systematic review and meta-analysis of the association between peripheral inflammatory cytokines and generalised anxiety disorder |
| <b>AUTHORS</b>             | Costello, Harry; Gould, Rebecca; Abrol, Esha; Howard, R                                                                             |

## VERSION 1 - REVIEW

|                        |                                                                                                                                       |
|------------------------|---------------------------------------------------------------------------------------------------------------------------------------|
| <b>REVIEWER</b>        | Wedekind; Dirk<br>University of Goettingen, Dept. of Psychiatry and Psychotherapy<br>von Siebold Strasse 5, 37075 Goettingen, Germany |
| <b>REVIEW RETURNED</b> | 11-Dec-2018                                                                                                                           |

|                         |                                                                                                                                                                                                                                                                                                                                                                                                                                                                                                                                                                                                                                                                                                                                                                                                                                                                                                                                                                                                                                                                                                                                                                                                                                                                                                                                                                                                                                                                                                                                                                                                                                            |
|-------------------------|--------------------------------------------------------------------------------------------------------------------------------------------------------------------------------------------------------------------------------------------------------------------------------------------------------------------------------------------------------------------------------------------------------------------------------------------------------------------------------------------------------------------------------------------------------------------------------------------------------------------------------------------------------------------------------------------------------------------------------------------------------------------------------------------------------------------------------------------------------------------------------------------------------------------------------------------------------------------------------------------------------------------------------------------------------------------------------------------------------------------------------------------------------------------------------------------------------------------------------------------------------------------------------------------------------------------------------------------------------------------------------------------------------------------------------------------------------------------------------------------------------------------------------------------------------------------------------------------------------------------------------------------|
| <b>GENERAL COMMENTS</b> | <p>Costello H, et al: A systematic review and meta-analysis of the association between peripheral inflammatory cytokines and generalised anxiety disorder</p> <p>The authors contribute a high quality meta-analysis on a timely and relevant issue. The importance of inflammatory processes in psychiatric disorders is increasingly recognized; nevertheless it has been focused by research for more than two decades. The amount of studies is fairly larger for other major disorders than GAD, such as major depression or schizophrenia. Yet, the importance for anxiety disorders appears to be striking, the methods are sound and the presentation of results is appealing. This manuscript may be recommended for publication in BMJ Open after some minor issues have been settled.</p> <p>The authors say that no longitudinal studies have been performed for the majority of biomarkers. This is remarkable since changes of GAD severity might well be associated with immune system markers. The authors would do well on commenting on this issue in the discussion or introductory part. The literature in this respect gives the impression that some studies did not elaborate the background of the chosen biomarkers very well.</p> <p>There is a large heterogeneity across studies and preliminary evidence might exist for only few of the investigated markers. To give the reader a comprehensive idea of what these findings could mean for the pathogenesis of GAD I would appreciate to see some implications in the discussion part and possible relationships to the finding in MD or schizophrenia.</p> |
|-------------------------|--------------------------------------------------------------------------------------------------------------------------------------------------------------------------------------------------------------------------------------------------------------------------------------------------------------------------------------------------------------------------------------------------------------------------------------------------------------------------------------------------------------------------------------------------------------------------------------------------------------------------------------------------------------------------------------------------------------------------------------------------------------------------------------------------------------------------------------------------------------------------------------------------------------------------------------------------------------------------------------------------------------------------------------------------------------------------------------------------------------------------------------------------------------------------------------------------------------------------------------------------------------------------------------------------------------------------------------------------------------------------------------------------------------------------------------------------------------------------------------------------------------------------------------------------------------------------------------------------------------------------------------------|

|                        |                                                       |
|------------------------|-------------------------------------------------------|
| <b>REVIEWER</b>        | Audrey Rankin<br>Queens University Belfast, N Ireland |
| <b>REVIEW RETURNED</b> | 21-Jan-2019                                           |

|                         |                                                                                                                                                                                                                                                                                                                                                                                                                                                                                                                                                                                                                                                                                                                                    |
|-------------------------|------------------------------------------------------------------------------------------------------------------------------------------------------------------------------------------------------------------------------------------------------------------------------------------------------------------------------------------------------------------------------------------------------------------------------------------------------------------------------------------------------------------------------------------------------------------------------------------------------------------------------------------------------------------------------------------------------------------------------------|
| <b>GENERAL COMMENTS</b> | This paper reports a meta-analysis which estimates the association between peripheral inflammatory cytokines and generalised anxiety disorder. The statistical analysis conducted utilises the standardised mean difference (SMD) approach which is an appropriate method given the different measurement methods used. The only comment I have is in relation the quality assessment conducted according to the Newcastle-Ottawa (NOS) criteria. Although the authors have commented on the overall quality of studies included in the review, the authors could comment on the quality of the four studies included in the meta-analyses in terms of the certainty of the evidence and implications for the results/conclusions. |
|-------------------------|------------------------------------------------------------------------------------------------------------------------------------------------------------------------------------------------------------------------------------------------------------------------------------------------------------------------------------------------------------------------------------------------------------------------------------------------------------------------------------------------------------------------------------------------------------------------------------------------------------------------------------------------------------------------------------------------------------------------------------|

### VERSION 1 – AUTHOR RESPONSE

Reviewer 1:

- The authors contribute a high quality meta-analysis on a timely and relevant issue. The importance of inflammatory processes in psychiatric disorders is increasingly recognized; nevertheless it has been focused by research for more than two decades. The amount of studies is fairly larger for other major disorders than GAD, such as major depression or schizophrenia. Yet, the importance for anxiety disorders appears to be striking, the methods are sound and the presentation of results is appealing. This manuscript may be recommended for publication in BMJ Open after some minor issues have been settled.

We thank the reviewer for their comments and are pleased that they consider the manuscript should be recommended for publication in BMJ Open (subject to revisions).

- The authors say that no longitudinal studies have been performed for the majority of biomarkers. This is remarkable since changes of GAD severity might well be associated with immune system markers. The authors would do well on commenting on this issue in the discussion or introductory part. The literature in this respect gives the impression that some studies did not elaborate the background of the chosen biomarkers very well.

We have now commented further on the lack of longitudinal studies in the discussion (page 12).

- There is a large heterogeneity across studies and preliminary evidence might exist for only few of the investigated markers. To give the reader a comprehensive idea of what these findings could mean for the pathogenesis of GAD I would appreciate to see some implications in the discussion part and possible relationships to the finding in MD or schizophrenia.

We have now commented on these implications in the discussion, particularly regarding future direction of research in GAD with regard to current research in MD and schizophrenia (page 12).

Reviewer 2:

- The only comment I have is in relation the quality assessment conducted according to the Newcastle-Ottawa (NOS) criteria. Although the authors have commented on the overall quality of studies included in the review, the authors could comment on the quality of the four studies included in the meta-analyses in terms of the certainty of the evidence and implications for the results/conclusions.

We have now commented specifically on the quality of studies included in the meta-analysis in the Results (page 7) and Discussion (page 10).

#### VERSION 2 – REVIEW

|                        |                                                                                                          |
|------------------------|----------------------------------------------------------------------------------------------------------|
| <b>REVIEWER</b>        | Dirk Wedekind<br>University of Goettingen, Dept. of Psychiatry and Psychotherapy,<br>Goettingen, Germany |
| <b>REVIEW RETURNED</b> | 29-Apr-2019                                                                                              |

|                         |                                                                                                                                                                              |
|-------------------------|------------------------------------------------------------------------------------------------------------------------------------------------------------------------------|
| <b>GENERAL COMMENTS</b> | According to the minor issues I had for the previous Version, these now appear to be well solved. I may recommend the manuscript for publication in BMJ in the present form. |
|-------------------------|------------------------------------------------------------------------------------------------------------------------------------------------------------------------------|

|                        |                                            |
|------------------------|--------------------------------------------|
| <b>REVIEWER</b>        | AUDREY RANKIN<br>Queens University Belfast |
| <b>REVIEW RETURNED</b> | 19-Apr-2019                                |

|                         |                                                                                                                                                                                                                               |
|-------------------------|-------------------------------------------------------------------------------------------------------------------------------------------------------------------------------------------------------------------------------|
| <b>GENERAL COMMENTS</b> | Thank you for the opportunity to review the revised manuscript. It is clear that the authors have made a substantial effort in revising this paper. Regarding my comments, I am happy with the changes and/or responses given |
|-------------------------|-------------------------------------------------------------------------------------------------------------------------------------------------------------------------------------------------------------------------------|
